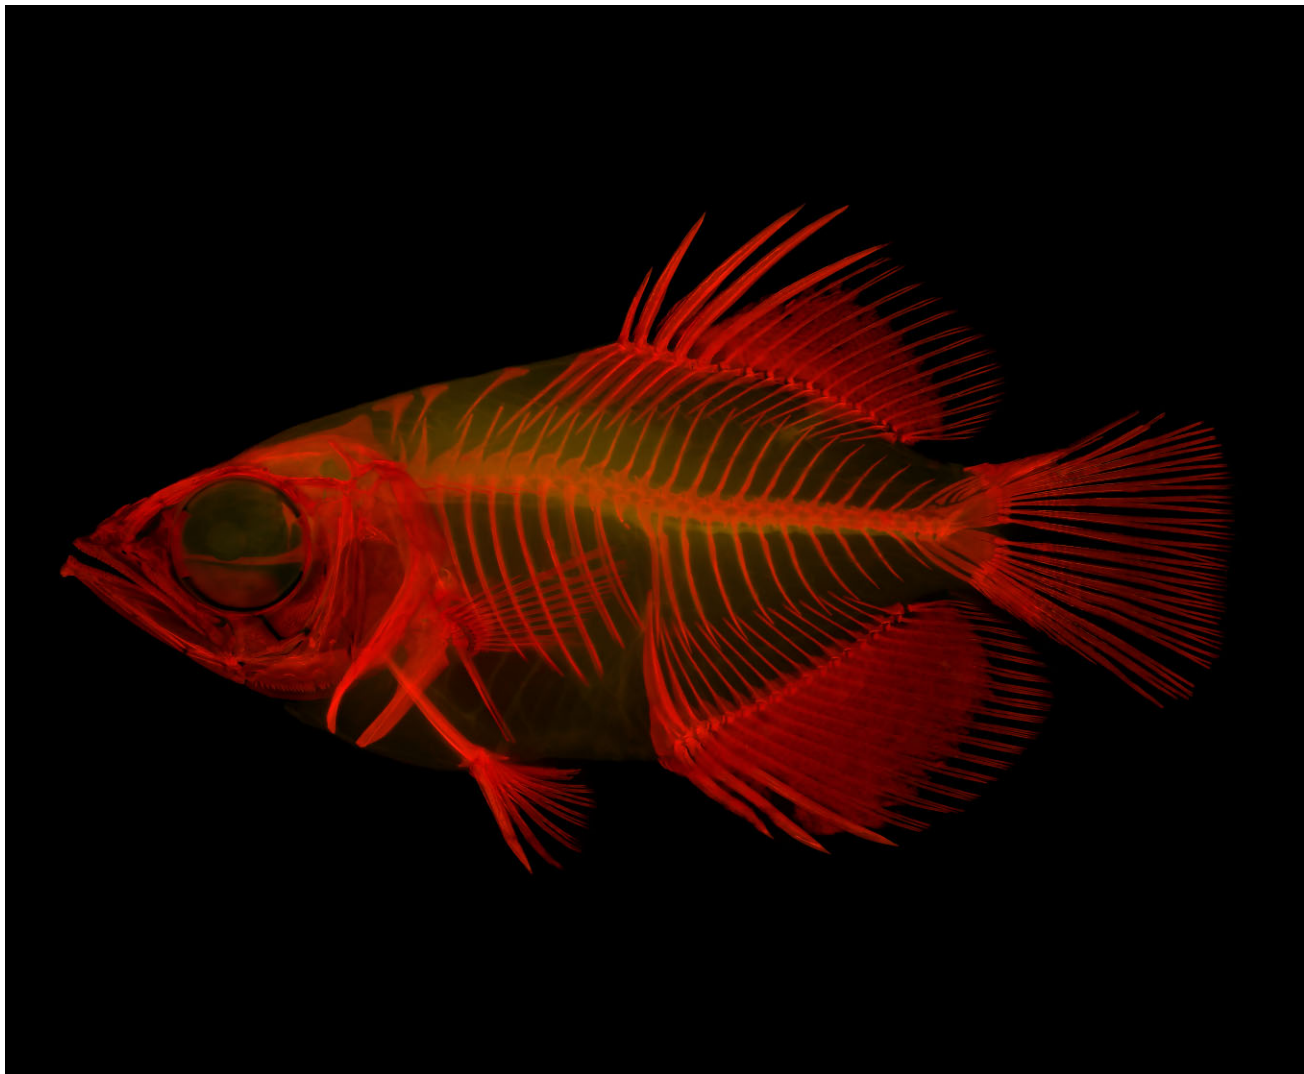

# Integrative Organismal Biology

A Journal of the Society  
for Integrative and  
Comparative Biology

[academic.oup.com/icb](https://academic.oup.com/icb)

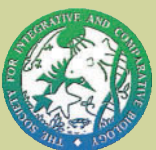

OXFORD  
UNIVERSITY PRESS

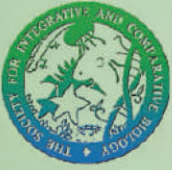

## ARTICLE

# Phylogenetics of Archerfishes (Toxotidae) and Evolution of the Toxotid Shooting Apparatus

M.G. Girard \*,<sup>†,‡,¶</sup> M.P. Davis ,<sup>‡</sup> Tan H.H. ,<sup>§</sup> D.J. Wedd ,<sup>¶</sup> P. Chakrabarty ,<sup>||</sup>  
W.B. Ludt ,<sup>\*\*</sup> A.P. Summers ,<sup>††</sup> and W.L. Smith \*

\*Department of Ecology and Evolutionary Biology and Biodiversity Institute, University of Kansas, Lawrence, KS 66045, USA; <sup>†</sup>Department of Vertebrate Zoology, Smithsonian National Museum of Natural History, Washington, DC 20560, USA; <sup>‡</sup>Department of Biological Sciences, St. Cloud State University, St. Cloud, MN 56301, USA; <sup>§</sup>Lee Kong Chian Natural History Museum, National University of Singapore, 117377, SGP; <sup>¶</sup>Research Institute for the Environment and Livelihoods, Charles Darwin University, Darwin, NT 0810, AUS; <sup>||</sup>Ichthyology Section, Museum of Natural Science, Department of Biological Sciences, Louisiana State University, Baton Rouge, LA 70803, USA; <sup>\*\*</sup>Department of Ichthyology, Natural History Museum of Los Angeles County, Los Angeles, CA 90007, USA; <sup>††</sup>Department of Biology and SAFS, University of Washington's Friday Harbor Laboratories, Friday Harbor, WA 98250, USA

<sup>†</sup>E-mail: [GirardMG@si.edu](mailto:GirardMG@si.edu)

### Synopsis

Archerfishes (Toxotidae) are variously found in the fresh- and brackish-water environments of Asia Pacific and are well known for their ability to shoot water at terrestrial prey. These shots of water are intended to strike their prey and cause it to fall into the water for capture and consumption. While this behavior is well known, there are competing hypotheses (blowpipe vs. pressure tank hypothesis) of how archerfishes shoot and which oral structures are involved. Current understanding of archerfish shooting structures is largely based on two species, *Toxotes chatareus* and *T. jaculatrix*. We do not know if all archerfishes possess the same oral structures to shoot water, if anatomical variation is present within these oral structures, or how these features have evolved. Additionally, there is little information on the evolution of the Toxotidae as a whole, with all previous systematic works focusing on the interrelationships of the family. We first investigate the limits of archerfish species using new and previously published genetic data. Our analyses highlight that the current taxonomy of archerfishes does not conform to the relationships we recover. *Toxotes mekongensis* and *T. siamensis* are placed in the synonymy of *T. chatareus*, *Toxotes carpentariensis* is recognized as a species and removed from the synonymy of *T. chatareus*, and the genus *Protoxotes* is recognized for *T. lorentzi* based on the results of our analyses. We then take an integrative approach, using a combined analysis of discrete hard- and soft-tissue morphological characters with genetic data, to construct a phylogeny of the Toxotidae. Using the resulting phylogenetic hypothesis, we then characterize the evolutionary history and anatomical variation within the archerfishes. We discuss variation in the oral structures and the evolution of the mechanism with respect to the interrelationships of archerfishes, and find that the oral structures of archerfishes support the blowpipe hypothesis but soft-tissue oral structures may also play a role in shooting. Finally, by comparing the morphology of archerfishes to their sister group, we find that the Leptobramidae has relevant shooting features in the oral cavity, suggesting that some components of the archerfish shooting mechanism are examples of co-opted or exapted traits.

**အနစ်ချုပ် (Burmese)**

လေးသည်တင်ငါးများ (Toxotidae) ကို အာရှပစိဖိတ်ဒေသ၏ ရေချိုနှင့်ရေငန်ပတ်ဝန်းကျင်များတွင် အမျိုးမျိုးတွင်ရှိရပြီး ကုန်း နသေးကောင်များကို ရေဖေ့ပြစ်နိုင်သော ၎င်းတို့၏စွမ်းရည်ကြောင့် လူသိများကျော်ကြားပါသည်။ ထိုရေဖေ့ပြစ်ခတ်မှု များသည် ၎င်းတို့၏သားကောင်ကို ရှိက်ခတ်ပြီး ဖမ်းဆီးစားသုံးရန်အတွက် ရေထဲသို့ကျစေရန် ရည်ရွယ်ချက်ဖြင့်ဖြစ်သည်။ ဤအပူအမြူကို ကောင်းမွန်စွာသိကြားလည်း လေးသည်တင်ငါးများ မည်သို့ရေပစ်ခတ်ပုံနှင့် မည်သည့်ခံတွင်းဖွဲ့စည်းမှု များ ပါဝင်ပတ်သက်ပုံဆိုင်ရာ အပြုအမူအဆိုင်ယူဆချက်များ (လမေ့တပိုင်ခြင်း vs. ဖအားတိုင်က ယူဆချက်) ရှိပါသည်။ လေး သည်တင်ငါး၏ ရေပစ်ခတ်မှုဆိုင်ရာ ဖွဲ့စည်းတည်ဆောက်ပုံ၏ လက်ရှိနားလည်ချက်သည် *Toxotes chatareus* နှင့် *T. jaculatrix* ဟုခေါ်သည့် မျိုးစိတ်နှစ်ခုအပေါ်တွင် ကျိုးစားစွာအခြေခံလျက်ရှိသည်။ လေးသည်တင်ငါးမျိုးစိတ်အားလုံးသည် ရေပစ်ခတ် ရန်အတွက် တူညီသောခံတွင်းဖွဲ့စည်းပုံရှိမရှိ၊ ထိုခံတွင်းဖွဲ့စည်းပုံများတွင် ကွဲလွဲမှုအစိတ်အပိုင်းဆိုင်ရာ ကွဲပြားမှုရှိမရှိ၊ သို့မဟုတ် ထိုအင်ဂါရပ်များ မည်ကဲ့သို့ဆိုင်ကဖွဲ့စည်းပုံတို့ကို ကျွန်ုပ်တို့မသိရှိပါ။ ထိုအပြု Toxotidae မျိုးစိတ်တစ်ခုလုံး၏ ဆိုင်ကဖွဲ့စည်းပုံအပေါ်တွင် အချက်အလက်အနည်းငယ်သာရှိပြီး ယခင်စနစ်တကျရှိသော လုပ်ဆောင်မှုအားလုံးကို မျိုးရိုး မိသားစု၏အပြုအမူဆက်နွယ်မှုများအပေါ်တွင် အာရုံစိုက်ခဲ့ကြောင်းတွင်တွေ့ရသည်။ ပထမဦးစွာ ကျွန်ုပ်တို့သည် လေးသည် တင်ငါးမျိုးစိတ်များ၏ ကန့်သတ်ချက်များကို မျိုးရိုးဗီဇဒေတာအသစ်နှင့် ယခင်က ထုတ်ပြန်ထားသော မျိုးရိုးဗီဇဒေတာများ ကို အသုံးပြု၍ စူးစမ်းလေ့လာပါသည်။ ကျွန်ုပ်တို့၏ခွဲခြမ်းစိတ်ဖြာမှုများအရ လေးသည်တင်ငါးများ၏ လက်ရှိမျိုးခွဲစနစ် သည် ကျွန်ုပ်တို့ပြန်လည်ရှာဖွေထားသည့် ဆက်နွယ်မှုများနှင့်မကိုက်ညီကြောင်းကို တွေ့ရှိရသည်။ ကျွန်ုပ်တို့၏ခွဲခြမ်းစိတ်ဖြာ မှုရလဒ်များအရ *Toxotes mekongensis* နှင့် *T. siamensis* များကို *T. chatareus* ၏အဓိပ္ပာယ်တူအဖွဲ့ ထားရှိထားပြီး *Toxotes carpentariensis* ကို မျိုးစိတ်တစ်ခုအဖွဲ့ အသိအမှတ်ပြုကာ *T. chatareus* ၏အဓိပ္ပာယ်တူအဖွဲ့မှ ဖယ်ထုတ်ထားပါသည်။ ဆက်၍ မျိုးစု *Protoxotes* ကို *T. lorentzi* အဖွဲ့ အသိအမှတ်ပြုထားပါသည်။ ထို့နောက် ကျွန်ုပ်တို့သည် Toxotidae ၏ဆိုင်ကဖွဲ့စည်း မှုသမိုင်းကို တည်ဆောက်ရန်အတွက် တသီးတခြားစီဖွဲ့စည်းမှု မာကျောသောနည်းပညာပျောင်းသောတစ်ရပ်ရပ်သော ရုပ်အသွင် ဖွဲ့စည်းပုံဝိသေသလက္ခဏာများနှင့် မျိုးရိုးဗီဇဆိုင်ရာအချက်အလက်များကို ပေါင်းစပ်ခွဲခြမ်းစိတ်ဖြာမှုကို အသုံးပြုသည့် ပေါင်းစပ်အဖွဲ့ရှာနည်းကို ပြုပြင်ပါသည်။ ထို့နောက် ရရှိလာသည့် ဆိုင်ကဖွဲ့စည်းမှုသမိုင်းဆိုင်ရာယူဆချက်ကို အသုံးပြုခြင်း အားဖြင့် ဆိုင်ကဖွဲ့စည်းမှုသမိုင်းနှင့် လေးသည်တင်ငါးများ၏ အတွင်းရှိ ကိုယ်ခန္ဓာအစိတ်အပိုင်းဆိုင်ရာ ကွဲပြားမှုကို ကျွန်ုပ်တို့ ဖော်ပြပါသည်။ လေးသည်တင်ငါးများ၏ အပြုအမူဆက်နွယ်မှုများနှင့်စပ်လျဉ်း၍ ခံတွင်းဖွဲ့စည်းပုံများတွင် ကွဲပြားခြင်း နားမှုနှင့် ထိုအင်ဂါရပ်အစိတ်အပိုင်းစု၏ ဆိုင်ကဖွဲ့စည်းမှုကို ကျွန်ုပ်တို့ဆွေးနွေးပြီး လေးသည်တင်ငါးများ၏ ခံတွင်းဖွဲ့စည်း တည်ဆောက်ပုံသည် လမေ့တပိုင်ခြင်းယူဆချက်ကို ထောက်ပံ့ပေးသောလည်း ပျော့ပျောင်းသောတစ်ရပ်ရပ်သည့် ခံတွင်း ဖွဲ့စည်းပုံများသည်လည်း ရေပစ်ခတ်ရာတွင် အခန်းကဏ္ဍတစ်ခုမှ ပါဝင်သည်ကို တွေ့ရှိရသည်။ နောက်ဆုံးအနေဖြင့် လေး သည်တင်ငါးများ၏ ရုပ်အသွင်ဖွဲ့စည်းပုံကို ၎င်းတို့၏မျိုးစပ်နှစ်ခုအုပ်စုနှင့် ယှဉ်ခြင်းအားဖြင့် Leptobramidae သည် ခံတွင်း အတွင်း၌ သက်ဆိုင်သော ရေပစ်ခတ်မှုဆိုင်ရာ အင်ဂါရပ်များရှိကြောင်းကို တွေ့ရှိရသည့်အတွက် လေးသည်တင်ငါး၏ ရေ ပစ်ခတ်မှုဆိုင်ရာ ယန္တရားအစိတ်အပိုင်းအချို့သည် မွေးစားထားသော (သို့) ဆိုင်ကဖွဲ့စည်းမှုမှ ပြောင်းလဲလာသော လက္ခဏာ များ၏ သာဓကများဖြစ်ကြောင်း အကဲဖြတ်ချက်ရှိပါသည်။

**सारांश (Hindi)**

धनुषाकार मछली (टोक्सोटिडि) एशिया प्रशांत के ताजे और खारे पानी के वातावरण में वभिन्नि रूप से पाए जाते हैं और स्थलीय शक्ति पर पानी को मुख से शूट करने की उनकी क्षमता के लिए जाने जाते हैं। पानी के इन शॉट्स का उद्देश्य अपने शक्ति को मारना और उसे पकड़ने और उपभोग के लिए पानी में गरिना है। जबकि यह व्यवहार सर्ववर्धित है, धनुषाकार मछली कैसे शूट करते हैं और कौन सी मौखिक संरचनाएं शामिल हैं, इस बारे में प्रतिसिपरी परिकल्पनाएं (ब्लोपाइप बनाम प्रेशर टैंक परिकल्पना) हैं। धनुषाकार मछली शूटिंग संरचनाओं की वर्तमान समझ काफी हद तक दो प्रजातियों, टोक्सोटस चैटेरियस और टोक्सोटस जैकुलैट्रिक्स पर आधारित है। हम नहीं जानते कि क्या सभी धनुषाकार मछली में पानी को शूट करने के लिए समान मौखिक संरचनाएं होती हैं, यदि इन मौखिक संरचनाओं के भीतर संरचनात्मक भिन्नता मौजूद है, या ये विशेषताएं कैसे विकसित हुई हैं। इसके अतिरिक्त, परिवार के अंतरसंबंधों पर ध्यान केंद्रित करने वाले पछिले सभी व्यवस्थित कार्यों के साथ, समग्र रूप से टोक्सोटिडि के विकास के बारे में बहुत कम जानकारी है। हम पहले नए और पहले प्रकाशित आनुवंशिक डेटा का उपयोग करके आर्चरफिश प्रजातियों की सीमाओं की जांच करते हैं। हमारे विश्लेषण इस बात पर प्रकाश डालते हैं कि धनुषाकार मछली की वर्तमान वर्गीकरण हमारे द्वारा पुनर्प्राप्त किए गए संबंधों के अनुरूप नहीं है। टोक्सोटस सियामेसिस और टोक्सोटस सियामेसिस को टोक्सोटस चटारियस के पर्यायवाची में रखा गया है, टोक्सोटस कारपेटारियनसिस को एक प्रजाति के रूप में पहचाना जाता है और टोक्सोटस चटारियस के पर्यायवाची से हटा दिया जाता है, और हमारे विश्लेषण के परिणामों के आधार पर जीनस प्रोटोक्सोटस टोक्सोटस लोरेसी के लिए मान्यता प्राप्त है। फिर हम टॉक्सोटिडि के एक फाइलोजेनी का निर्माण करने के लिए आनुवंशिक डेटा के साथ असतत कठोर और नरम-ऊतक रूपात्मक वर्णों के संयुक्त विश्लेषण का उपयोग करते हुए एक एकीकृत दृष्टिकोण लेते हैं। परिणामी फाइलोजेनेटिक परिकल्पना का उपयोग करते हुए, हम तब क्रमिक विकास और आर्चरफिश के भीतर शारीरिक भिन्नता की विशेषता रखते हैं। हम मौखिक संरचनाओं में भिन्नता और धनुषाकार मछली के अंतरसंबंधों के संबंध में तंत्र के क्रमिक विकास पर चर्चा करते हैं, और पाते हैं कि धनुषाकार मछली की मौखिक संरचनाएं ब्लोपाइप परिकल्पना का समर्थन करती हैं, लेकिन नरम-ऊतक मौखिक संरचनाएं भी शूटिंग में भूमिका निभा सकती हैं। अंत में, धनुषाकार मछली के आकारिकी की उनकी बहन समूह से तुलना करके, हम पाते हैं कि लेप्टोब्रामिडि में मौखिक गुहा में प्रासंगिक शूटिंग विशेषताएं हैं, यह सुझाव देते हुए कि धनुषाकार मछली शूटिंग तंत्र के कुछ घटक सह-चयनित या अतिरिक्त लक्षणों के उदाहरण हैं।

Downloaded from https://academic.oup.com/iob/article/4/1/iobac013/6551314 by guest on 20 April 2024

### Ringkasan (Indonesian)

Ikan-ikan pemanah atau sumpit-sumpit (Toxotidae) secara beragam dapat ditemukan di sejumlah lingkungan perairan tawar atau payau di Asia Pasifik dan dikenal luas karena kemampuan mereka dalam menembakkan air ke mangsa terestrial. Tembakan air tersebut ditujukan untuk menghantam mangsa mereka dan menjatuhkannya ke dalam air sebagai tangkapan dan konsumsi. Walaupun perilaku ini diketahui luas, terdapat sejumlah hipotesis yang bersaing (hipotesis sumpitan vs. tangki bertekanan) mengenai bagaimana ikan-ikan pemanah ini menembak dan struktur-struktur oral mana saja yang terlibat di dalamnya. Pemahaman terkini mengenai struktur-struktur penembak pada ikan-ikan pemanah ini sebagian besar didasari pada dua spesies, *Toxotes chatareus* dan *T. jaculatrix*. Adapun kita belum mengetahui apakah semua ikan pemanah memiliki struktur-struktur oral yang sama untuk menembakkan air, apakah terdapat variasi anatomis di dalam struktur-struktur oral tersebut, ataupun bagaimana perangkat ciri-ciri tersebut telah ber-evolusi. Terlebih dari itu, masih terdapat sedikit informasi mengenai evolusi Toxotidae secara keseluruhan, sementara penelitian-penelitian sistematis terdahulu kesemuanya terpaku pada keterkerabatan famili tersebut. Kami pertama-tama menelusuri batasan dari spesies-spesies ikan pemanah menggunakan data genetik baru dan yang sebelumnya dipublikasikan. Sejumlah analisis kami menggarisbawahi bahwa taksonomi terkini dari ikan-ikan pemanah tidak sesuai dengan pola kekerabatan yang kami temukan. Berdasarkan hasil-hasil analisis kami, *Toxotes mekongensis* dan *T. siamensis* ditempatkan dalam kesinoniman *T. chatareus*, *Toxotes carpentariensis* dikenali sebagai suatu spesies dan dikeluarkan dari kesinoniman *T. chatareus*, serta marga *Protoxotes* diperuntukkan bagi *T. lorentzi*. Kami kemudian melakukan pendekatan integratif, melalui analisis gabungan antara sejumlah karakter morfologis diskrit meliputi jaringan keras dan lunak dengan data genetik, untuk merumuskan filogeni dari Toxotidae. Dengan menggunakan hipotesis filogenetik yang dihasilkan, kami kemudian mengkarakterisasi sejarah evolusioner dan variasi anatomis sesama ikan pemanah. Kami membahas variasi pada struktur-struktur oral tersebut beserta evolusi dari mekanismenya sesuai dengan keterkerabatan ikan-ikan pemanah, dan menemukan bahwa struktur-struktur oral pada ikan-ikan pemanah mendukung hipotesis sumpitan, sementara struktur-struktur oral jaringan lunak juga mungkin berperan dalam proses menembak. Akhirnya, melalui perbandingan morfologi ikan-ikan pemanah dengan kelompok saudara mereka, kami menemukan bahwa Leptobramidae memiliki perangkat menembak dalam rongga mulutnya yang terkait, sehingga menunjukkan bahwa sejumlah komponen dari mekanisme menembak ikan-ikan pemanah tersebut merupakan contoh-contoh bagi sejumlah sifat yang terkooptasi atau tereksaptasikan.

### Sinopsis (Malay)

Pelbagai jenis Ikan Sumpit (Toxotidae) dapat dijumpai di persekitaran air tawar dan payau di Asia Pasifik dan mereka terkenal dengan kebolehan mereka menembak air ke arah mangsa di darat. Tembakan air ini bertujuan untuk menyerang mangsa mereka dan menyebabkan mereka jatuh ke dalam air untuk ditangkap dan dimakan. Walaupun tingkah laku ini diketahui umum, terdapat hipotesis yang bersaing (hipotesis sumpitan vs. tangki tekanan) tentang cara ikan sumpit menembak dan struktur mulut yang terlibat. Pemahaman semasa tentang struktur menembak ikan sumpit adalah sebahagian besarnya berdasarkan dua spesies, *Toxotes chatareus* dan *T. jaculatrix*. Kami tidak pasti sama ada semua ikan sumpit mempunyai struktur mulut yang sama untuk menembak air, jika variasi anatomi terdapat dalam struktur mulut ini, atau bagaimana ciri-ciri ini telah berkembang. Tambahan pula, terdapat sedikit maklumat tentang evolusi Toxotidae secara keseluruhan, dengan semua penyelidikan sistematis sebelum ini memfokuskan pada hubungan saling keluarga. Kami pada mulanya mengkaji had spesies ikan sumpit ini menggunakan data genetik baharu dan yang diterbitkan sebelum ini. Analisis kami menunjukkan bahawa taksonomi semasa ikan sumpit tidak mematuhi hubungan yang kami perolehi. *Toxotes mekongensis* dan *T. siamensis* diletakkan bersama kesinoniman *T. chatareus*, *Toxotes carpentariensis* yang diiktiraf sebagai satu spesies dan dikeluarkan daripada kesinoniman *T. chatareus*, dan genus *Protoxotes* yang diiktiraf untuk *T. lorentzi* adalah berdasarkan hasil analisis kami. Kemudian kami mengambil pendekatan integratif, menggunakan analisis gabungan karakter morfologi tisu keras dan lembut diskret dengan data genetik, untuk membina filogeni Toxotidae. Menggunakan hipotesis filogenetik yang terhasil, kami kemudian mencirikan sejarah evolusi dan variasi anatomi dalam ikan sumpit. Kami membincangkan variasi dalam struktur mulut dan evolusi mekanisme berkenaan yang berkaitan dengan ikan sumpit, dan mendapati bahawa struktur mulut ikan sumpit menyokong hipotesis sumpitan tetapi struktur mulut tisu lembut juga mungkin memainkan peranan dalam cara menembak. Akhir sekali, dengan membandingkan morfologi ikan sumpit kepada kumpulan saudara mereka, kami mendapati bahawa Leptobramidae mempunyai ciri penangkapan yang relevan dalam rongga mulut mereka, menunjukkan bahawa beberapa komponen mekanisme penangkapan ikan sumpit merupakan contoh ciri-ciri yang diikuti-sertakan atau diguna semula.

**සාරාංශය (Sinhala)**

“දිමිත්තන්” නැතහොත් “ආ(ර්)වර්-ඊෂ(ස්)” (Archerfish; Toxotidae) ආසියා-පැසිෆික් කලාපීය කිවුල් සහ මිරිදිය පරිසර පද්ධති වල වාසය කරන මත්ස්‍ය කුලයකි. “දුනුක්කාරයා” යනඅන්වර්තනාමයෙන් හැඳින්වෙන මෙම මසුන්ගේ ප්‍රමුඛ හැසිරීම් රටාවක් වනුයේ ජල-ස්තරයට ඉහලින් සැටිසරන කුඩා සතුන් කුරුමානම් කරමින් ජල-ප්‍රහාර එල්ල කිරීමට ඔවුන් සතු දුලබහැකියාවයි. ජල ප්‍රහාර වලට ලක්ව වතුරට පතිතවන සතුන් මත යැපෙන දිමිත්තන්ගේ මෙම හැසිරීම් රටාව පැහැදිලි කිරීමට විද්‍යාත්මක යාන්ත්‍රණ කිහිපයක් මේ වනවිට ඉදිරිපත් කර තිබේ. එහෙත් මූලිකවම දිමිත්තන් විශේෂ 2ක් (*Toxotes chatareus* සහ *T. jaculatrix*) අධ්‍යනයෙන් එළඹී මෙම පැහැදිලි කිරීම්, පොදු වශයෙන් සියලු දිමිත්තන්ගේ මෙම අපූරු හැසිරීම් රටාව පහදාදීමට තරම් පොහොසත් වන්නේද යන්න තවමත් අපැහැදිලිය. මෙයට මූලිකම හේතුව නම් මෙම මසුන් විශේෂ කුල පවත්නා ව්‍යුහ විද්‍යාත්මක වෙනස්කම් හෝ මෙම විශේෂ අතර පවතිනාපරිණාමික බැඳීම් පිළිබඳ නිසි අධ්‍යනයක් මෙතෙක් සිදුවී නොමැති බැවිනි. එනමින්, දිමිත්තන්ගේ පරිණාමික බන්ධුතා (phylogenetic relationships) සහ විශේෂ-මායිම් (species limits) සෙවීමෙහිලා අප විසින් ඔවුන්ගේ ජානමය සහ ව්‍යුහ-විද්‍යාත්මක විශ්ලේෂණ පෙළක් සිදුකලෙමු. දැනට පිලිගැනෙන්නාවූ ගනානුගතික වර්ගීකරණ සීමාවන්ගෙන් ඔබ්බට ගිය නව පරිණාමික බන්ධුතා පෙළක් මේ ඔස්සේ අපි ඉදිරිපත් කරන්නෙමු. මෙලෙස, *Toxotes chatareus* විශේෂය තුලට *T. mekongensis* සහ *T. siamensis* යන පෙර-මත්ස්‍ය විශේෂ ඇතුලත් කරන අතර, *Toxotes carpentariensis* නමින් නව විශේෂයක් *T. chatareus* තුලින් අප විභේදනය කරන්නෙමු. තවද, ප්‍රෝටොක්සෝටිස් *Protoxotes* මත්ස්‍ය ගණය තුලට *T. lorentzi* විශේෂය ඇතුලත් කරන්නේ දිමිත්තන්ගේ නාමකරණයට නව අරුතක් එක්කරමිනි. මෙලෙස උපකල්පිත දිමිත්තන්ගේ නව පරිණාමික වෘක්ෂය යොදාගනිමින් මෙහෙයවූ සංසන්දනාත්මක විශ්ලේෂණ ඔස්සේ යමින් මෙම මත්ස්‍ය කොට්ටාශයේ පරිණාමය සහ ව්‍යුහමය විවිධත්වය පිළිබඳව සවිස්තරාත්මක අධ්‍යනයක ප්‍රතිපල අප මෙසේ පිළිගන්වන්නෙමු. අවසාන වශයෙන්, දිමිත්තන්ගේ සහෝදර මත්ස්‍ය කුලය වන ලෙජටෝබ්‍රමිඩාවන් *Leptobramidae* සමඟින් කල සංසන්දනාත්මක අධ්‍යනයකින් අප එළඹී නිගමනය වන්නේ දිමිත්තන්ගේ ජල-ප්‍රහාරක යාන්ත්‍රණයේ ඇරඹුම ව්‍යුහමය පරිණාමයකසේම කෘත්‍යමය අනුවර්තනයක සම්ප්‍රයුක්ත ප්‍රතිපලයක් බවයි.

**Boud (Tagalog)**

Ang mga kataba o archerfish (Toxotidae) ay nakikita sa mga tubig-tabang o matabsing na lugar sa Asia Pacific, kung saan kilala ang mga ito sa kanilang kakayahan na bumuga ng tubig sa kanilang bibiktimahing hayop na nasa tuyong lupa. Ang tubig na binubuga ng mga kataba ay tatama sa kanilang biktima upang mahulog ang mga ito sa tubig at mahuli ng mga kataba para kainin. Kilala ang mga kataba sa kakayahang ito, ngunit may nagkukumpitensyang mga hipotesis (blowpipe vs. pressure tank hypothesis) patungkol sa kung paano bumubuga ng tubig ang mga kataba at kung anong mga oral structures ang kanilang ginagamit. Ang kasulukuyang kaalaman natin dito ay base sa dalawang species, *Toxotes chatareus* at *T. jaculatrix*. Hindi natin alam kung pare-parehas ba ang mga oral structures ng lahat ng kataba na kanilang ginagamit sa pagbuga ng tubig, o kung paano nag-evolve ang mga ito. Bukod pa rito, kaunti rin ang datos at kaalaman natin sa mismong ebolusyon ng Toxotidae dahil ang mga naunang sistematikong pag-aaral ay tumutok sa mga pagkakaugnay ng mga miyembro ng pamilyang ito. Una, sinuri namin ang mga species ng kataba gamit ang bago at nailathalang genetic data. Ayon sa aming pagsusuri, ang kasulukuyang taksonomiya ng mga kataba ay hindi sumusunod sa mga nakuha naming pagkakaugnay-ugnay ng mga species. Ang *Toxotes mekongensis* at *T. siamensis* ay inilagay sa synonymy ni *T. chatareus*, ang *Toxotes carpentariensis* ay kinilalang species at tinanggal sa synonymy ni *T. chatareus*, at ang genus *Protoxotes* ay kinilala para kay *T. lorentzi*. Pinagsama naman namin ang discrete hard- and soft-tissue morphological characters at genetic data upang buuin ang phylogeny ng Toxotidae. Ang phylogenetic hypothesis na resulta ng pinagsamang datos ay aming ginamit para ilarawan ang katangian ng ebolusyonaryong kasaysayan at pagkakaiba-iba ng anatomiya ng mga kataba. Tinalakay din naming ang pagkakaiba-iba ng mga oral structures at ebolusyon ng mekanismong konektado dito sa konteksto ng pagkakaugnay ng mga kataba, at nakita namin na ang mga oral structures ng mga kataba ay sinusupportahan ang blowpipe hypothesis, ngunit maaaring may kontribusyon din ang soft-tissue oral structures sa pagbuga ng tubig. Pinakahuli, sa pagkumpara ng morfolohiya ng mga kataba sa kanilang sister group, nakita namin na ang *Leptobramidae* ay mayroon ding mga katangian sa kanilang oral cavity para magbuga ng tubig, na nagpapahiwatig na may mga parte ng mekanismo ng pagbuga ng tubig ng mga kataba na halimbawa ng co-opted o exapted traits.

### สรุปความ (Thai)

ปลาเสือพ่นน้ำ (Toxotidae) สามารถพบได้ทั่วไปทั้งในแหล่งน้ำจืดและน้ำกร่อยของภูมิภาคเอเชียแปซิฟิกและเป็นที่ทราบดีว่าเป็นปลาที่สามารถพ่นน้ำไปสู่เหยื่อที่อยู่เหนือน้ำได้ ซึ่งการพ่นน้ำไปสู่เหยื่อนี้เป็นการโจมตีโดยตรงต่อเหยื่อทำให้เหยื่อตกลงน้ำก่อนที่จะจับกินเป็นอาหาร ถึงแม้ว่าพฤติกรรมดังกล่าวจะเป็นที่ทราบกันดีโดยทั่วไปแต่ก็ยังคงมีการประชันสมมติฐานระหว่างทฤษฎีท่อเป่าและทฤษฎีถึงแรงดันว่าปลาเสือพ่นน้ำนั้นพ่นน้ำได้อย่างไรและมีโครงสร้างของปากอะไรบางอย่างที่เกี่ยวข้อง ความเข้าใจในปัจจุบันซึ่งเกี่ยวกับโครงสร้างที่ใช้ในการพ่นน้ำส่วนมากมาจากการศึกษาในปลาเสือพ่นน้ำสองชนิด ได้แก่ *Toxotes chatareus* และ *T. jaculatrix* ซึ่งอันที่จริงแล้วเรายังไม่ทราบว่าปลาเสือพ่นน้ำแต่ละชนิดมีโครงสร้างปากที่ใช้เพื่อการพ่นน้ำเหมือนกันหรือไม่ และหากมีความหลากหลายทางกายวิภาคของโครงสร้างปากเหล่านี้แล้วโครงสร้างเหล่านี้มีวิวัฒนาการอย่างไร นอกจากนี้ยังขาดข้อมูลในภาพรวมที่เกี่ยวข้องกับวิวัฒนาการของกลุ่มปลาเสือพ่นน้ำอีกด้วย ทั้งนี้เนื่องจากการศึกษาเชิงระบบที่ผ่านมามีแนวโน้มจะเน้นความสัมพันธ์ระหว่างวงศ์ คณะผู้ทำการวิจัยได้ตรวจสอบข้อจำกัดดังกล่าวในปลาเสือพ่นน้ำโดยอาศัยข้อมูลทางพันธุกรรมที่เผยแพร่ใหม่และเผยแพร่ก่อนหน้านี้ ผลที่ได้จากการวิเคราะห์นั้นยืนยันว่าอนุกรมวิธานของปลาเสือพ่นน้ำในปัจจุบันไม่สอดคล้องกับความสัมพันธ์ที่เราค้นพบ โดยคณะผู้วิจัยพบว่า *Toxotes mekongensis* และ *T. siamensis* ถูกจัดให้เป็นชื่อพ้องของ *T. chatareus* ส่วน *Toxotes carpentariensis* ถือว่าเป็นชนิดโดยตนเองและถูกถอดออกจากการเป็นชื่อพ้องของ *T. chatareus* สำหรับสกุล *Protoxotes* นั้นใช้เรียก *T. lorentzi* จากนั้นคณะผู้วิจัยได้บูรณาการการวิเคราะห์ข้อมูลโดยรวมของข้อมูลสัณฐานวิทยาของเนื้อเยื่อแข็งและเนื้อเยื่ออ่อนร่วมกับข้อมูลทางพันธุกรรมเพื่อสร้างสายวิวัฒนาการของปลาในวงศ์ Toxotidae จากสายวิวัฒนาการสมมติฐานที่ใด คณะผู้วิจัยจึงทำการระบุลักษณะสำคัญวิวัฒนาการและความแตกต่างทางกายวิภาคของปลาเสือพ่นน้ำ คณะผู้วิจัยอภิปรายถึงการเปลี่ยนแปลงของโครงสร้างปากและกลไกทางวิวัฒนาการโดยอาศัยความสัมพันธ์ของปลาเสือพ่นน้ำ ซึ่งพบว่าโครงสร้างปากของปลาเสือพ่นน้ำเกือบทุกทฤษฎีท่อเป่า แต่โครงสร้างปากที่เป็นเนื้อเยื่ออ่อนอาจทำหน้าที่ในการพ่นน้ำในท้ายที่สุด การเปรียบเทียบสัณฐานวิทยาของปลาเสือพ่นน้ำกับปลาในสกุลที่ใกล้เคียงทำให้คณะผู้วิจัยพบว่าปลาในวงศ์ Leptobramidae มีโครงสร้างปากที่ใช้สำหรับการพ่นน้ำสอดคล้องกัน ซึ่งสิ่งนี้แสดงให้เห็นว่าองค์ประกอบของกลไกการพ่นน้ำของปลาเสือพ่นน้ำเป็นตัวอย่างของลักษณะรวมทางวิวัฒนาการ

### Tóm tắt (Vietnamese)

Cá mang rỏ hay còn gọi là cá cung thủ (Toxotidae) rất phổ biến và đa dạng trong các thủy vực nước ngọt và nước lợ ở Châu Á Thái Bình Dương, được biết đến với khả năng bắn nước vào con mồi ở trên cạn. Việc phóng tia nước này là hình thức bắt mồi bằng cách tấn công con mồi khiến chúng rơi xuống nước. Mặc dù hành vi này đã được ghi nhận, tuy nhiên, những giả thuyết gây tranh cãi vẫn tồn tại (giả thuyết ống thổi và giả thuyết bình áp suất) về cách cá mang rỏ bắn nước và những cấu trúc nào ở miệng có liên quan đến hoạt động này. Sự hiểu biết hiện tại về cấu tạo của cá cung thủ chủ yếu dựa vào hai loài, *Toxotes chatareus* và *T. jaculatrix*. Chúng tôi không biết liệu tất cả các loài cá mang rỏ có sở hữu cấu trúc miệng giống nhau để bắn nước hay không, liệu có sự khác biệt về giải phẫu cấu trúc miệng, hay những đặc điểm này đã tiến hóa như thế nào. Ngoài ra, có rất ít thông tin về sự tiến hóa của Toxotidae nói chung, với tất cả các công trình có hệ thống trước đây tập trung vào các mối quan hệ giữa các loài trong họ. Trước tiên, chúng tôi xác định giới hạn của các loài cá mang rỏ bằng cách sử dụng dữ liệu di truyền mới và đã được công bố trước đây. Các phân tích của chúng tôi nhấn mạnh rằng cách phân loại hiện tại của cá mang rỏ không phù hợp với các mối quan hệ mà chúng tôi phát hiện. *Toxotes mekongensis* và *T. siamensis* là loài đồng danh với *T. chatareus*, *Toxotes carpentariensis* được công nhận là một loài và do đó không còn là loài đồng danh với *T. chatareus*, và chi *Protoxotes* được xác định cho loài *T. lorentzi*. Sau đó, chúng tôi áp dụng cách tiếp cận tích hợp, kết hợp phân tích các đặc điểm hình thái của mô mềm và cứng với dữ liệu di truyền, để xây dựng phả hệ phát sinh loài của Toxotidae. Sử dụng kết quả của giả thuyết phát sinh loài, chúng tôi mô tả đặc điểm lịch sử tiến hóa và sự biến đổi giải phẫu bên trong cá mang rỏ. Chúng tôi thảo luận về sự biến đổi trong cấu trúc miệng và sự phát triển của cơ chế liên quan đến mối quan hệ giữa các loài của cá mang rỏ và nhận thấy rằng khảo sát cấu trúc miệng của cá mang rỏ ủng hộ giả thuyết về ống thổi nhưng cấu trúc mô mềm ở miệng cũng có thể đóng vai trò trong việc bắn nước. Cuối cùng, bằng cách so sánh hình thái của cá mang rỏ với nhóm gần gũi của chúng, chúng tôi thấy rằng họ cá Leptobramidae có các đặc điểm bắn nước liên quan trong khoang miệng, cho thấy rằng một số thành phần của cơ chế cá mang rỏ bắn nước là ví dụ về đặc điểm đồng chọn trong quá trình tiến hóa.

## Introduction

Few predation strategies are more striking than those of the archerfishes (Toxotidae). Archerfishes are well known for their ability to shoot a jet of water from their mouth, striking terrestrial prey such that they fall into the water for capture and consumption (Smith, 1936, 1945; Myers, 1952; Dill, 1977; Schuster et al., 2004; Schuster, 2007). Archerfishes will also shoot water at the benthos, dispersing sediment to dislodge buried prey (Dewenter et al., 2017). Found in the fresh- and brackish-water environments of the Indo-West Pacific (Fig. 1), these fishes attack a variety of organisms—from small arthropods to tetrapods, such as juvenile lizards (e.g., Gill, 1909; Smith, 1936; Salini et al., 1998). While the archerfish hunting behavior was initially noted by Schlosser (1764), a hypothesis of how these fishes shoot water was not proposed until H. M. Smith, with the assistance of G. S. Myers (see Smith, 1945; Myers, 1952), described two structures in the mouth of archerfishes—an elongate and narrow groove formed by soft tissue in the roof of the mouth, between the tooth patches on the endopterygoids (hereafter, palatal groove), and a basihyal with an elevation on its posterior aspect (Smith, 1936, 1945). Often called the “blowpipe” or “blowtube” hypothesis, a shot would be formed via a tube-like opening between the palatal groove and the hard and soft tissues of the basihyal. Although the blowpipe hypothesis proposed by Smith is the predominant hypothesis, the morphology of the shooting apparatus and the blowpipe hypothesis have been disputed. Elshoud and Koomen (1985:251) state that the ventral margin of the parasphenoid is nearly flat, allowing for “no good match” between the roof of the mouth and basihyal to gather and direct water. They also note that the palatal groove terminates at the posterior margin of the vomer, “nullifying” the effects of the groove for shooting. Instead, Elshoud and Koomen (1985) hypothesize that the archerfish shot is formed by an anterior aperture or break in the oral valves, calling this mechanism the “pressure tank” hypothesis. Although these two hypotheses appear to compete, particularly because Elshoud and Koomen (1985) explicitly refute Smith (1936, 1945) and Myers’ (1952) findings, the blowpipe and pressure-tank hypotheses may not be mutually exclusive and the palatal groove, basihyal, and oral valves may all contribute to the mechanism. In addition to questions about which oral structures make up the archerfish shooting mechanism, our current understanding of the behavior is based on the two of the most widespread archerfish species, the Banded Archerfish (*Toxotes jaculatrix*) and the Spotted Archerfish (*T. chatareus*). Only three of the ten currently recognized

species of archerfishes (*T. blythii*, *T. chatareus*, and *T. jaculatrix*) have been reported to perform this name-sake hunting strategy (Kottelat and Tan, 2018). We do not know if all archerfishes possess the same oral structures, if anatomical variation is present among these oral structures, or how these features have evolved.

Previous investigations that sampled archerfishes focused on the interrelationships of the Toxotidae, which have allied the family among other perch-like fishes (Percoidei *sensu* Johnson, 1984; e.g., Greenwood et al., 1966; McAllister, 1968; Gosline, 1971; Springer and Orrell, 2004, Mirande, 2016; Girard et al., 2020). Early morphology-based hypotheses (e.g., Günther, 1860; Gosline, 1971) suggested several allies to the Toxotidae, from the Chaetodontidae to the Nandidae, but explicit relationships were not necessarily identified. The works by McAllister (1968) and Mok and Shen (1983) allied the Toxotidae with all or a subset of the squamipinne fishes (*sensu* Mok and Shen, 1983), which included the families Acanthuridae, Chaetodontidae, Drepaneidae, Enoplosidae, Ephippidae, Girellidae, Kyphosidae, Monodactylidae, Pentacerotidae, Pomacanthidae, Scatophagidae, Scorpididae, Siganidae, and Zanclidae. Mok and Shen (1983) found osteological support for a sister-group relationship between the Kyphosidae and the Toxotidae based on the presence of an additional pharyngobranchial element on the second infrapharyngobranchial (their character 32), seven circumorbitals (their character 35), and an unbranched sensory canal in the lachrymal (their character 38). Subsequent DNA-based phylogenetic analyses recovered the archerfishes among a different clade of fishes that includes the Carangidae, Cynoglossidae, Latidae, Nematistiidae, and Psettodidae, among others (Chen et al., 2003, 2007; B. Li et al., 2009; Yagishita et al., 2009; C. Li et al., 2011; Betancur-R. and Ortí, 2014; Smith et al., 2016). Here, we follow the terminology used by Girard et al. (2020) and refer to this clade as the Carangiformes. While these DNA-based hypotheses consistently recover the Toxotidae within the Carangiformes, archerfishes have been found sister to different carangiform clades, including the Latidae (Li et al., 2009; Rabosky et al., 2018), Istiophoridae and Xiphiidae (Near et al., 2013; Campbell et al., 2014), Menidae (Near et al., 2012), Nematistiidae (Li et al., 2011; Mirande, 2016; Smith et al., 2016), Psettodidae (Campbell et al., 2013), a clade containing Carangidae, Coryphaenidae, and Menidae (Chen et al., 2007), or a clade containing Carangidae, Paralichthyidae, and Pleuronectidae (Yagishita et al., 2009). However, as studies have sampled more carangiform families, including depauperate

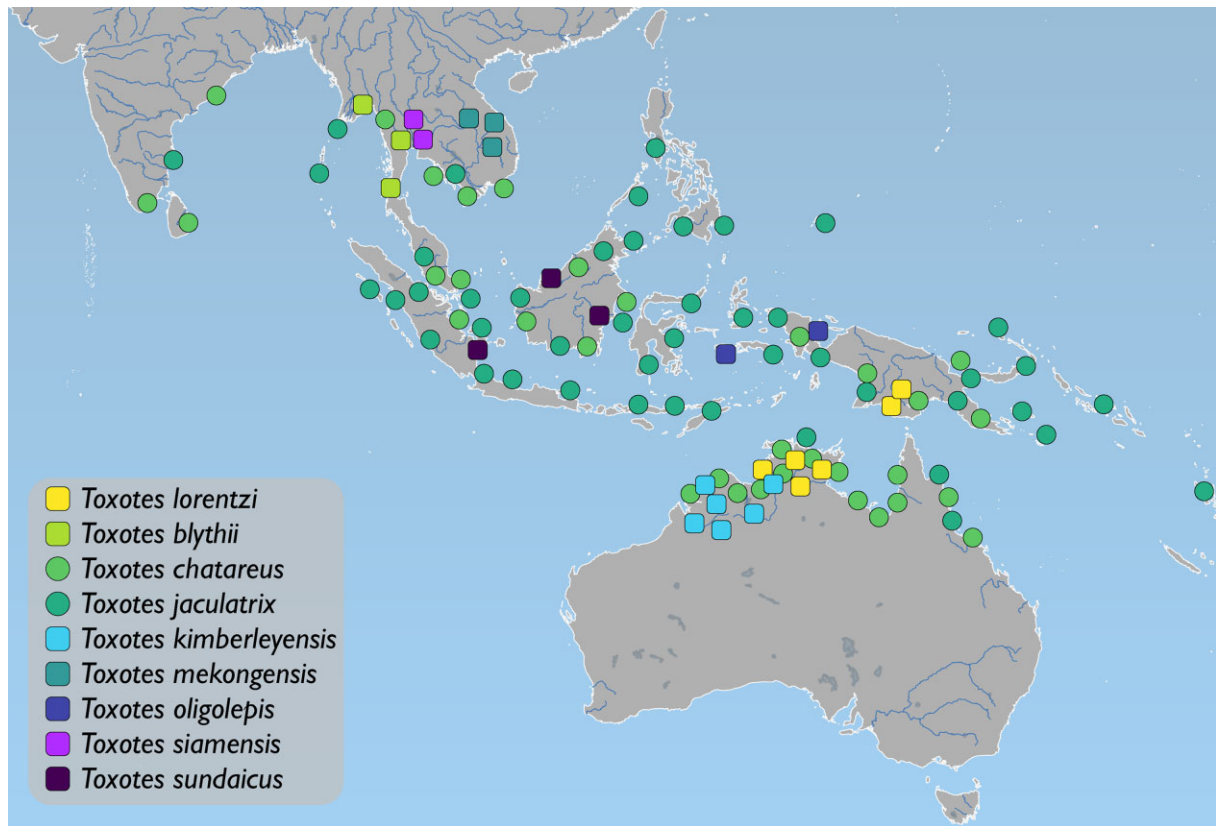

Fig. 1 Distribution of archerfishes (Toxotidae) across the Indo-West Pacific based on Allen (1978, fig. 1) with modification. Map generated in QGIS v3.10 (QGIS Development Team, 2020) using the ocean, rivers + lake centerlines, lakes + reservoirs, and land vector polygons from naturalearthdata.com. Data for *Toxotes kimberleyensis* and *T. lorentzi* supplemented by GBIF data. Data for *T. mekongensis*, *T. siamensis*, and *T. sundaicus* added based on distributions described in Kottelat and Tan (2018). Round symbols indicate freshwater- and brackish-water-dwelling taxa. Square symbols indicate freshwater-dwelling taxa.

lineages, there has been growing evidence for the archerfishes being sister to the beachsalmons (Leptobramidae) based on various scales of genetic loci (Betancur-R. et al., 2013a, 2013b, 2017; Betancur-R. and Ortí, 2014; Harrington et al., 2016; Sanciangco et al., 2016) as well as a combination of morphology-based and DNA-based data (Girard et al., 2020). Girard et al. (2020) highlighted several anatomical characters supporting a sister-group relationship between the Leptobramidae and the Toxotidae (=Toxotoidei), including, but not limited to, the posterior placement of the basihyal and the absence of a medial extrascapular. While we are making progress in understanding the placement of the Toxotidae with respect to the larger carangiform radiation, there has yet to be a study focusing on the intrarelations among archerfishes.

To date, three taxonomic studies have focused on describing and differentiating extant species of archerfishes (Allen, 1978, 2004; Kottelat and Tan, 2018). These studies emphasized external counts, pigmentation patterns, and measurements to separate species

of *Toxotes*, with the most-recently described taxa, *T. mekongensis*, *T. siamensis*, and *T. sundaicus*, primarily differentiated from congeners based on flank pigmentation and body shape. With the emphasis on external characters, there is little information available regarding internal characters for the described species of archerfishes. Furthermore, no published works have included DNA-sequence data to test the current taxonomy of the Toxotidae or to hypothesize relationships among recognized species.

In this study, we ask the following questions: (1) Is the current taxonomy of the Toxotidae supported by DNA-sequence data?; (2) What are the intrarelations among species of the Toxotidae?; (3) Is there variation in oral structures across archerfishes?; (4) Do the oral structures of archerfishes support either or both of the two functional hypotheses for how archerfishes shoot?; and (5) How do the intra- and inter-relationships of the Toxotidae inform the evolution of the archerfish's shooting structures? We first approach the taxonomy of archerfishes using new and



previously published genetic data to test the limits of archerfish species. Considering these initial findings, we take an integrative approach, using a combination of hard- and soft-tissue discrete morphological characters and genetic data, to construct a phylogeny of archerfishes. Then, we highlight variation in the oral cavity of archerfishes and discuss previously described misinterpretations about archerfish oral structures. Finally, we use the resulting hypothesis of relationships and morphological findings to characterize the evolutionary history of this clade.

## Materials and methods

### Taxon sampling

We generated two partially overlapping molecular datasets and one morphological dataset in this study. The first molecular dataset will be called the “22-terminal” dataset and includes 11 taxa, including five outgroup taxa and six nominal species of the Toxotidae. Outgroup taxa were chosen based on the results of previous DNA-based (e.g., Betancur-R. et al., 2013a, 2013b; Harrington et al., 2016; Smith et al., 2016) and combined studies (i.e., Mirande, 2016; Girard et al., 2020) that recovered the Toxotidae among the carangiform fishes. These outgroups included taxa from the Centrarchidae, Latidae, Leptobramidae, Nematistiidae, and Percidae. Within archerfishes, four species were represented by multiple individuals including: *Toxotes blythii* (three individuals), *T. chatareus* (eight individuals), *T. jaculatrix* (two individuals), and *T. siamensis* (two individuals). In total, the 22-terminal dataset sampled six of the ten currently recognized species of archerfishes. Tissue samples for the remaining four nominal species of archerfishes were not available to be sampled. When constructing our second molecular dataset for the “13-terminal” analysis, we removed duplicate archerfish taxa, so each taxon was represented by one individual. Taxa in the morphological dataset were selected based on the results of the 22-terminal analyses and sampled 13 taxa. These include the five outgroup taxa from the 22-terminal analyses and eight archerfish species. We identified three specimens that match the paralectotype of *T. microlepis* (BMNH 1859.7.1.43) in lateral-line scale count, body shape, and pigmentation pattern (see Kottelat and Tan, 2018). However, Kottelat and Tan (2018) identified conflict between the lectotype and paralectotype of *T. microlepis*, causing us to question the identity of these specimens. Considering this, we did not include specimens of *T. microlepis* in this study. The molecular dataset for the 13-terminal dataset sampled ten taxa, including five outgroup taxa and five members of the Toxotidae. Taxa in the 13-terminal molecular dataset were selected based on

the results of the 22-terminal analyses, locality information, specimens used in the morphological dataset, and amount of missing molecular data in the sample. Genetic data from *T. kimberleyensis*, *T. oligolepis*, and *T. sundaicus* were not available for analysis but were represented in the 13-terminal matrix by morphological data. Lists of taxa used in both the morphological and molecular components of this study can be found in the Material examined section and Supplementary Table 1, respectively. Symbolic codes for institutional resource collections follow Sabaj (2020). Both the morphological and molecular datasets were rooted with the centrarchid *Lepomis cyanellus*.

### Collection of morphological data

A novel morphological dataset was constructed for this study that included 100 hard and soft-tissue characters coded for all taxa sampled in the 13-terminal dataset. Of the 100 characters included in the morphological dataset, 36 characters were either explicitly coded from, based on, or modified from the following sources: McAllister, 1968; Patterson, 1970; Miller and Lea, 1972; Greenwood, 1976; Allen, 1978; 2004; Mok and Shen, 1983; Webb, 1989; Munroe, 1992; Westneat, 1993; Shinohara, 1994; Ross, 2001; Morgan and Gill, 2006; Springer and Smith-Vaniz, 2008; Pethiyagoda and Gill, 2013; Kimura et al., 2016; Märss et al., 2017; Kottelat and Tan, 2018; Rojo, 2018; Girard et al., 2020. All multistate characters were coded and analyzed as unordered characters. Descriptions of characters examined are listed in Supplementary File 1. Morphological characters were coded from formalin-fixed and ethanol-preserved specimens, disarticulated dry skeletons, dissected cleared-and-stained specimens, and formalin-fixed and ethanol-preserved specimens that were scanned using micro-computed tomography ( $\mu$ CT). We followed the methods described in Potthoff (1984) in preparing cleared-and-stained specimens with the modifications listed in Girard et al. (2020). Cleared-and-stained specimens were dissected following the protocol of Weitzman (1974) as it pertains to the circumorbital series, suspensorium, branchial basket, and pectoral girdle. Additionally, a subset of specimens were stained using the methods listed above but the “clearing” components of the protocol (i.e., steps involving trypsin) were omitted so soft-tissue features could be examined. The final morphological matrix (Supplementary Table 2) includes 1,306 of 1,313 possible entries and is 99% complete at the level of individual character states. Most of the missing character states are those that could not be determined from  $\mu$ CT samples.

As many archerfish species are rare in museum collections, it was not possible to sample every species

via clearing and staining. To view and code anatomical features of these rare taxa, specimens were  $\mu$ CT scanned in batches of up to eight specimens at a time using either a Bruker SkyScan 1173 at the Karl F. Liem Bioimaging Center at the University of Washington's Friday Harbor Laboratories (FHL) and in association with the ScanAllFish project or a GE Phoenix v|tome|x m at the National Museum of Natural History (USNM). Scanning at FHL was performed using 65 kV, 123  $\mu$ A, a 1.175 s exposure time, a 1 mm aluminum filter, and between 19.8  $\mu$ m and 35.5  $\mu$ m voxel size. The resulting image stacks were reconstructed into three-dimensional images using the software package NRecon. Three-dimensional reconstructions of the  $\mu$ CT scans were input into DataViewer v1.5.1.2 to isolate individual specimens from the batches they were scanned in without resizing or compression. Scanning at USNM was performed using 110 kV, 220  $\mu$ A, a 200 ms exposure time, and a 74.8  $\mu$ m voxel size. The resulting image stack was reconstructed into a three-dimensional image using the software package datos|x v2.4.0.1199. Specimen catalog numbers, preparation types, and MorphoSource media identifiers for the resulting  $\mu$ CT scans can be found in the Material examined section.

### Imaging of morphology

For specimens that were whole or stained, morphological features were examined with a Leica M205 C or a Nikon SMZ-745T microscope. Digital photography was used to visualize specimens and morphological features using a variety of imaging techniques. Images were taken using a Nikon D500 with either a Venus Optics Laowa 60 mm f/2.8 2X Ultra-Macro lens or a Venus Optics Laowa 25 mm f/2.8 2.5–5X Ultra-Macro lens. Specimens were illuminated by either daylight LED lighting (=5,000 K) from two eighteen-watt CREE Daylight bulbs or high-energy Royal Blue lighting (440–460 nm) emitted from two twelve-watt ABI Blue LED PAR38 bulbs plugged into two independent E26 lightbulb sockets. When anatomical features were difficult to view due to being poorly stained, surrounded by non-fluorescent soft tissue, or closely applied to other elements, these features were viewed and imaged under Royal Blue lighting to take advantage of the autofluorescent properties of alizarine staining, similar to those shown in [Girard and Smith \(2016\)](#) and [Ponssa and Abdala \(2020\)](#). To view and image features under Royal Blue lighting, we followed the protocol established by [Smith et al. \(2018\)](#) and the filter modifications listed by [Girard et al. \(2020\)](#). To overcome the small depth of field in high magnification images, several images were photographed via z-stacking (also known as focus stacking; see [Smith et al., 2018](#)). Images for z-stacking were taken using the camera, lens, and optional filter

combinations listed above with the camera attached to a WeMacro 100 mm focus stacking rail controlled by a Cognisys Stackshot Controller and Helicon Remote v3.9.5. Digital images at different focal distances were then algorithmically combined into a single composite image using Helicon Focus v6.7.1.

For  $\mu$ CT scanned specimens, the resulting isolated specimen image stacks were viewed and manipulated for lighting and opacity using CTvox v3.0 (Bruker) or the SlicerMorph module ([Rolfe et al., 2021](#)) in 3D Slicer v4.13.0 ([Fedorov et al., 2012](#)). Hard tissues were coded and imaged using the tools in CTvox, with custom transfer functions, or in 3D Slicer by modifying the region of interest (ROI) box in the “volume rendering” module. For specific anatomical elements, features were segmented from the surrounding scanned specimen using 3D Slicer. All morphology that was segmented with 3D Slicer were first isolated from the larger scan using the ROI feature in the “volume rendering” module. These ROIs were separated from the background using the “threshold” or “grow from seeds” functions within the “Segment Editor” module. For the “threshold” function, the osteological feature was further isolated using the scissors tool and then visualized using the “volume rendering” module in 3D Slicer.

### DNA extraction, locus amplification, and sequence alignment

A DNeasy Tissue Extraction Kit (Qiagen) or a Maxwell RSC Blood DNA Kit and Instrument (Promega) were used to extract DNA from the tissue samples of archerfishes following manufacturers' extraction protocols. The first or combined first and second elution from a Qiagen filter were dried to a volume of 102  $\mu$ L using a Savant DNA120 SpeedVac Concentrator (Thermo Scientific). The combined elution increased the amount of DNA collected. Once the DNA was extracted, 2  $\mu$ L of the DNA extracts were quantified using a Qubit Fluorometer 2.0 (Invitrogen) with the Qubit dsDNA BR Assay Kit (Invitrogen). Final quantified samples (100  $\mu$ L in volume) were sent to Arbor Biosciences for library preparation (e.g., DNA shearing, size selection, cleanup), target capture, enrichment, sequencing on an Illumina HiSeq 2500 or NovaSeq 6000 (Illumina), and demultiplexing. The 500 ultraconserved element (UCE) actinopterygian-loci probe set ([Faircloth et al., 2013](#)) was used for target capture.

Sequence data were provided as compressed FASTQ formatted files of demultiplexed sequence data from multiple runs from Arbor Biosciences. These data were uncompressed and combined into two read files for each newly sequenced taxon. Two read files were cleaned of adapter contamination and low-quality bases using the parallel wrapper illumiprocessor v2.10

(Faircloth, 2013) around trimmomatic v0.39 (Bolger et al., 2014). Cleaned sequencing reads were submitted to GenBank and have been assigned SRA Accession Numbers SRR17680273–SRR17680287 under BioProject PRJNA798425 (Supplementary Table 1). Cleaned reads and previously published UCE data, obtained from Girard et al. (2020; BioProject Accession Number PRJNA604383; Supplementary Table 1), were assembled using a Python script (`assemblo_spades.py`) in PHYLUCe v1.7.0 (Faircloth et al., 2012; Faircloth, 2016) and the short paired-end read sequence assembler SPAdes v3.14.1 (Prjibelski et al., 2020) with the default settings. Once assembled, a relational database that contained all probes was built using a Python script (`match_contigs_to_probes.py`, PHYLUCe) and LASTZ v1.0.4 (Harris, 2007) to identify taxon-specific contigs within the assembled UCE loci. Minimum coverage and minimum identity for identifying UCEs were set to 80%. The relational database was searched using the PHYLUCe script `get_match_counts.py` to generate a list of UCE loci shared among all taxa. This list was input into the PHYLUCe script `get_fastas_from_match_counts.py` to create a single FASTA file containing all UCE sequence data for all taxa. The data in this file were divided by locus using `explode_get_fastas_file.py` within PHYLUCe and aligned using MAFFT v7.475 (Katoh and Standley, 2013). Each locus alignment that contained data from a minimum of 14 taxa for the 22-terminal and six taxa for the 13-terminal dataset (minimally 65% complete) was converted into PHYLIP-format files for analyses.

In addition to UCE loci, we extracted mitochondrial gene fragments of cytochrome oxidase subunit 1 (hereafter, COI) from high-throughput cleaned sequencing reads received from Arbor Biosciences. Recent studies have performed similar extractions of these data to verify identification and include additional character information in the analyses (e.g., Ghedotti et al., 2018; Martin et al., 2018; Girard et al., 2022). Gene fragments were extracted from cleaned reads using Geneious v11.1.5 (Kearse et al., 2012) and the protocol outlined in Girard et al. (2022). Homologous regions collected were cleaned of ambiguities and inspected for stop codons using Geneious. These extracted COI sequences are available in Supplementary File 2. Sequences that correspond to taxa within the 22-terminal and 13-terminal datasets were then collated into a PHYLIP file aligned with MAFFT v7 (Katoh and Standley, 2013).

#### Partitioning schemes and nucleotide substitution models

For the 22-terminal dataset, 433 aligned UCE loci were analyzed. For the 13-terminal dataset, 458 aligned UCE loci were analyzed. Mean sequence fragment length was

1,300 base pairs (bps), with a range of 146–3,853 bps (Supplementary Table 1) across all UCE loci. For the 22-terminal dataset, UCE loci were concatenated into a single matrix that contained 596,707 bps in length ( $\approx 73\%$  complete) and 47,396 parsimony-informative sites. For the 13-terminal dataset, UCE loci were concatenated into a single matrix that contained 655,372 bps in length ( $\approx 78\%$  complete) and 41,802 parsimony-informative sites. The two matrices of UCE loci were partitioned using the sliding-window site characteristics–entropy method (Tagliacollo and Lanfear, 2018), which split each UCE locus into left and right flanking regions and the ultraconserved core (i.e., center segment). The left, central, and right UCE segments were used as input data blocks for PartitionFinder v2.1.1 (Lanfear et al., 2014, 2017; Stamatakis, 2014) to find the best-fitting nucleotide substitution model for each data partition. The following PartitionFinder parameters were set to the subsequent option: `branchlengths` set to `linked`; `models` set to `GTR`, `GTR + G`, and `GTR + I + G`; `model_selection` set to `AICc`; `schemes_search` set to `rlclusterf`. PartitionFinder was used with the default setting along with `-raxml`. The output from PartitionFinder listed 409 subsets for the 22-terminal matrix and 400 subsets for 13-terminal matrix, both with associated models for these regions. A list of the subsets of UCEs, partitions, and associated models can be found in Supplementary Tables 3 and 4.

The two mitochondrial gene matrices both resulted in a 655 bp alignment. The 22-terminal dataset was  $\approx 96\%$  complete and contained 203 parsimony-informative sites. The 13-terminal dataset was  $\approx 94\%$  complete and contained 191 parsimony-informative sites. Both COI matrices were broken into three partitions: one partition designated for each of the three codon positions in the protein-coding locus. These three partitions were then used as input for PartitionFinder v2.1.1 (Lanfear et al., 2014, 2017; Stamatakis, 2014) using the same settings as above. PartitionFinder designated three subsets with associated models for both matrices. These partitions and associated models are listed in Supplementary Tables 3 and 4.

#### Analysis of molecular data matrices

Following assembly and partitioning of DNA-based matrices, we performed two different sets of analyses of the 22-terminal dataset. We first analyzed the 22-terminal COI data matrix and an independent partition model file using IQ-Tree v2.1.2 (Chernomor et al., 2016; Minh et al., 2020). The model file included the three PartitionFinder-designated subsets and associated models. We performed 20 independent runs of IQ-Tree, setting the modification number of unsuccessful iterations to stop (`-nstop`) to 2,000. We then used the

resulting trees from these analyses as starting trees for a second set of analyses in IQ-Tree. These starting trees, along with the matrix and partition model file, were analyzed with the following settings: nearest-neighbor interchange search (-allnni), number of trees in the candidate set to maintain during tree search (-nbest) to 25, and number of unsuccessful iterations to stop (-nstop) set to 5,000. Support for the resulting topology with the best likelihood score was assessed by analyzing 200 standard bootstrap replicates (-bo). The second set of analyses of the 22-terminal dataset analyzed the UCE sequences using IQ-Tree and an independent partition model file that included the 409 subsets and associated models. Analyses were conducted using the same methods as described for the COI matrix above. The phylogeny with the best likelihood score from both analyses was visualized with FigTree v1.4.4 (Rambaut, 2012). All standard bootstrap replicates were reconciled with the best-fitting phylogeny and the resulting bootstrap replicates using IQ-Tree (-con; Fig. 2).

### Species-hypotheses analysis

To objectively propose species boundaries of taxa within the 22-terminal dataset, we used the software Assemble Species by Automatic Partitioning (ASAP; Puillandre et al., 2021) to independently analyze the mitochondrial locus. We used the software via the web interface (<https://bioinfo.mnhn.fr/abi/public/asap/>) to analyze the data three times, once using each of the JC69, K80, and p-distance options.

### Combined analysis of morphological and molecular data matrices

Considering the results from the 22-terminal analyses, we refined the identity and taxonomy of archerfishes and simultaneously analyzed the 13-terminal COI, UCE, and morphological matrices using IQ-Tree and an independent partition model file. The number of partitions in the combined analysis was 404 (400 from the UCE matrix). Analyses in IQ-Tree were conducted using the same methods as described for the 22-terminal datasets with one exception: taxa represented by exclusively morphological data (see above) were excluded from the support analysis.

### Character optimization

With the inferred phylogeny of archerfishes, we used the resulting tree topology and our morphological matrix (Figs. 3 and 4, Supplementary Table 2) as input data for WinClada v1.00.08 (Nixon, 2002) to view morphological transformations across the phylogeny. The characters were mapped onto our topology using a parsimony optimization and the WinClada option that

allows for unambiguous changes only. We also used WinClada to view fast and slow optimizations (i.e., ACCTRAN and DELTRAN, respectively) of characters. However, we will focus on the unambiguous changes in the following sections with this optimization shown in Fig. 4.

## Results

Hereafter, order- and suborder-level terminology follow Girard et al. (2020).

### Species of archerfishes and taxonomic changes

The hypotheses of relationships for the 22-terminal dataset are shown in Fig. 2. The support analyses of the COI matrix yielded 11 nodes ( $\approx 57\%$ ) with a bootstrap value of  $\geq 80\%$  and seven nodes ( $\approx 36\%$ ) with a bootstrap value of  $\geq 95\%$ . The support analyses of the UCE matrix yielded 15 nodes ( $\approx 78\%$ ) with a bootstrap value of  $\geq 95\%$ . The resulting topologies from both analyses support five archerfish lineages: a clade that includes *Toxotes lorentzi*; a clade that includes all samples of *T. blythii*; a clade that includes all samples of *T. jaculatrix*; a clade that includes all samples of *T. mekongensis*, *T. siamensis*, and the non-Australian *T. chatareus*; a clade that includes all samples of the Australian *T. chatareus* (Fig. 2). The results from the three executions of the ASAP software designated a set of species grouping options with associated p-values (Fig. 2A). All three executions of the ASAP software yielded the lowest p-value also in support of five groups of archerfishes within our analysis (JC69 = 0.0101, K80 = 0.0152, dist = 0.0166).

Based on the results from the 22-terminal analyses, we treat *T. mekongensis* Kottelat and Tan 2018 and *T. siamensis* Kottelat and Tan 2018 as synonyms of *T. chatareus* (Hamilton 1822). Additionally, we recognize *T. carpentariensis* Castelnau 1878 as a species of archerfish that represents a southern or Australian lineage of the specimens typically referred to as *T. chatareus* following Allen (1978). Finally, due both morphological and genetic difference between *T. lorentzi* and the remaining species of archerfishes and its placement as the sister species to all other archerfishes, we recognize the genus *Protoxotes* Whitley 1950 for this taxon to highlight its distinctiveness and the similarity among species of *Toxotes*. The following sections discuss these taxonomic changes. Subsequent analyses, results, and discussion in this study follow this revised taxonomy for the Toxotidae.

### Phylogeny of archerfishes

The hypothesis of relationships for the 13-terminal analysis is shown in Figs. 3 and 4. All nodes that were recovered in the support analysis yielded a bootstrap value of  $\geq 99\%$ . The resulting topology from the

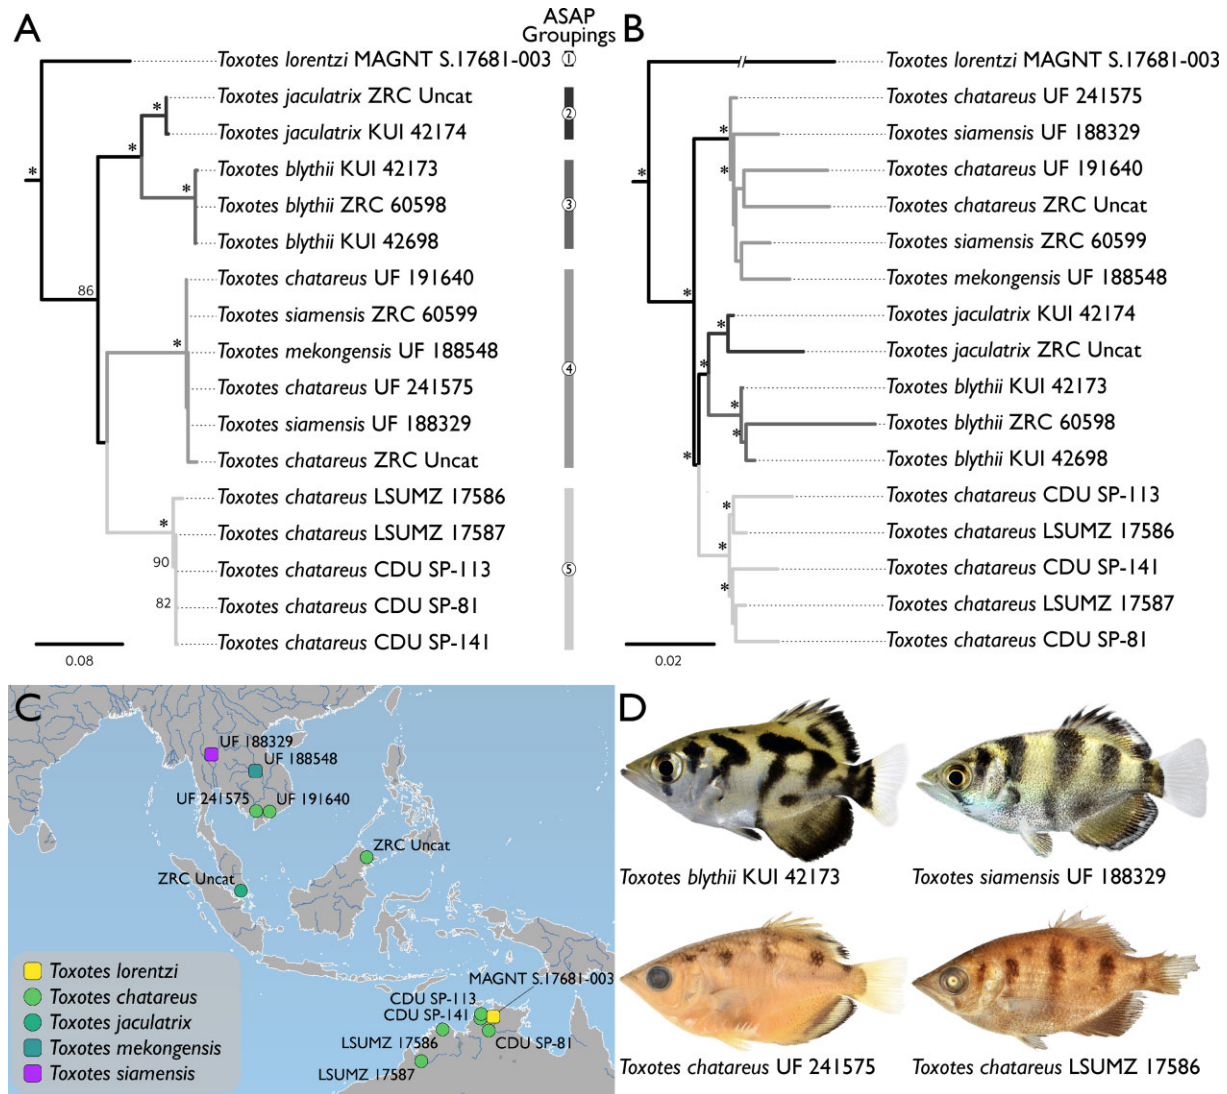

Fig. 2 Hypotheses of relationships from partitioned likelihood analysis of archerfishes (Toxotidae) in the 22-terminal dataset. All specimens from Charles Darwin University marked as “CDU.” (A) Dataset included one mitochondrial locus. Support was determined based on 200 bootstrap replicates. All nodes in the support analysis that yielded bootstrap values  $\geq 95\%$  are indicated by a “\*.” Phylogeny truncated to only show the Toxotidae. Group designations from ASAP shown by bars on right-side of phylogeny. Branches of phylogeny colored to match group designations from ASAP. (B) Dataset included 433 UCE loci. Support was determined based on 200 bootstrap replicates. Branch with “//” is reduced in length by half. All nodes in the support analysis that yielded a bootstrap value  $\geq 95\%$  are indicated by a “\*.” Phylogeny truncated to only show the Toxotidae. Branches of phylogeny colored to match group designations from ASAP. (C) Map shows areas where samples included in the above analyses were collected. Samples from the aquarium trade are excluded from the map. Map generated in QGIS v3.10 (QGIS Development Team, 2020) using the ocean, rivers + lake centerlines, lakes + reservoirs, and land vector polygons from naturalearthdata.com. Round symbols indicate freshwater- and brackish-water-dwelling taxa. Square symbols indicate freshwater-dwelling taxa. (D) Photos of vouchers included in analyses under white or daylight LED light. Images not to scale. Photo of UF 188329 voucher courtesy of Zachary S. Randall, Florida Museum of Natural History, with modification.

13-terminal analysis showed a monophyletic Toxotidae in the carangiform suborder Toxotoidei that is sister to the Leptobramidae (Figs. 3 and 4). *Protoxotes lorentzi* is recovered as the sister group to a monophyletic *Toxotes*. *Toxotes sundaicus* is recovered as the sister group of all other *Toxotes*. Within *Toxotes*, we recover *T. chatareus*, *T. carpentariensis*, *T. blythii*, and *T. kimberleyensis* in a

grade leading to a clade composed of *T. jaculatrix* sister to *T. oligolepis*.

To examine character evolution within archerfishes and allies, morphological characters were optimized onto the topology (Fig. 4). Of these character transformations, 52 of 125 ( $\approx 41\%$ ) are unique and unreversed (Fig. 4). The following section discusses a subset

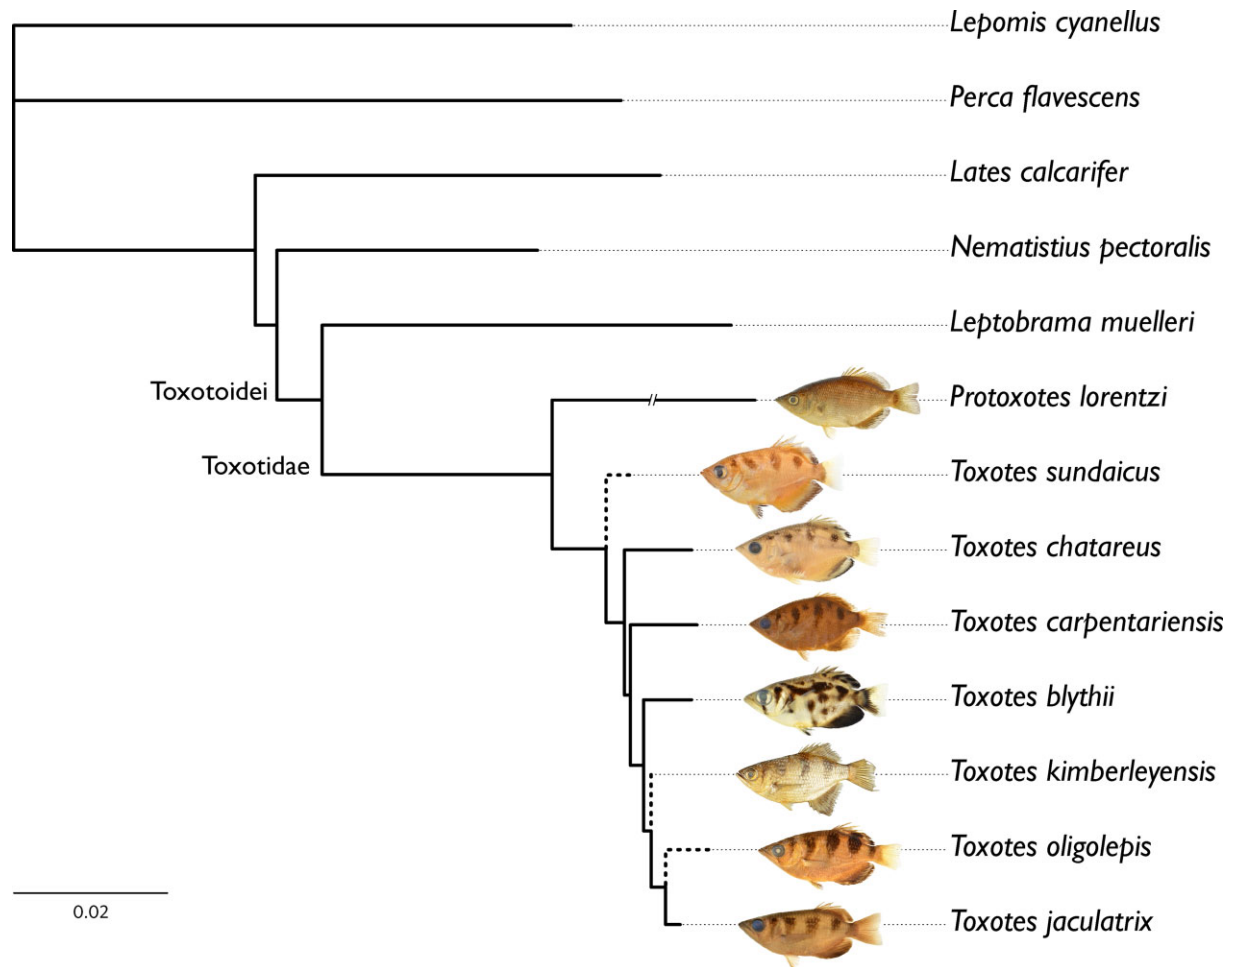

**Fig. 3** Hypothesis of relationships from partitioned likelihood analysis of archerfishes (Toxotidae) and outgroup taxa from the 13-terminal dataset. Dataset included 100 morphological characters, 458 ultraconserved element loci, and one mitochondrial locus. Support was determined based on 200 bootstrap replicates. All nodes included in the support analysis yielded a bootstrap value  $\geq 99\%$ . Branch with “//” is reduced in length by half. Dashed branches indicate terminals that were represented only by morphological data that were excluded from the bootstrap analyses. Catalog numbers for the images of specimens as they appear in the figure: USNM 406792; ZRC 42270 paratype; UF 241575; USNM 173503; LSUMZ 17019; AMS I.42570–001 paratype (courtesy of Kerry Parkinson and Amanda Hay, Australian Museum, with modification); SU 29567; CAS 206640. Specimen images not to scale.

of characters that optimize in support of the relationships recovered with respect to the Toxotoidei.

#### Morphological variation in archerfish oral structures

We found that all species of archerfishes possess an elongate and narrow palatal groove and an enlarged and toothed basihyal with an elevation on the posterior aspect (Fig. 5). The soft-tissue palatal groove extends from near the posterior aspect of the endopterygoids to near the anterior margin of the palatine tooth plates (Fig. 5A) and is associated with an indentation or groove in the ventral aspect of the parasphenoid (Fig. 5B). The soft tissue associated with the palatal groove is robust in cross section and there is an abun-

dance of tissue within the groove such that it folds onto itself (Fig. 5A). The groove tissue is considerably flexible, even in fixed specimens. The lateral walls of the bony parasphenoid groove originate near the medial part of the orbit, becoming most pronounced anteriorly and before the end of the parasphenoid (Fig. 5B). The ventral margin of the vomer also possesses a groove posterior to the vomerine tooth plate, but this groove is reduced compared to the parasphenoid groove. The soft tissue overlying this groove is largely smooth and slopes towards the vomerine tooth plate (Fig. 5A). Finally, the posterior aspect of the vomerine tooth plate is indented mesially, near the termination of the vomerine groove (Fig. 5A and 5B). A large basihyal occupies most of the oral cavity in all archerfishes. The overall

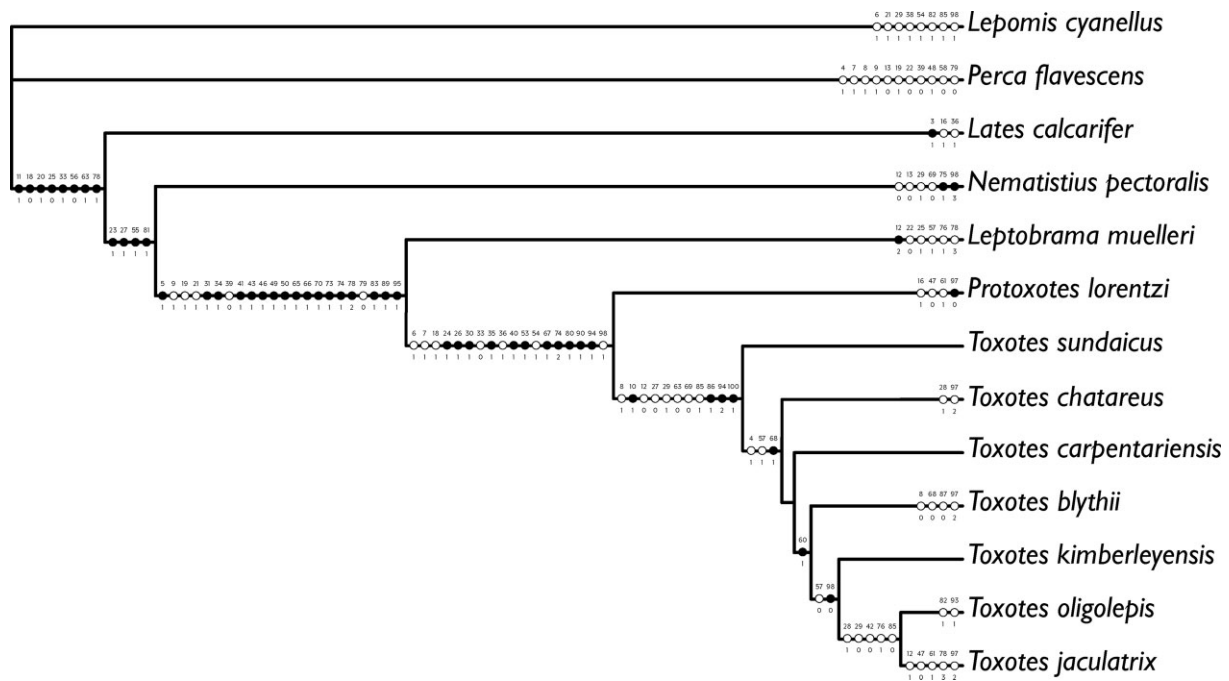

Fig. 4 Hypothesis of relationships from partitioned likelihood analysis of archerfishes and outgroup taxa from the 13-terminal dataset. Morphological characters optimizing unambiguously onto each branch are represented by a circle with the corresponding character number listed above and corresponding character state below. Circles with black fill are unique and unreversed character states. Circles with white fill are states that optimize multiple times in the phylogeny.

topology of the dorsal aspect of the basihyal, the posterior elevation of the basihyal, the presence of teeth on the basihyal, and the presence of soft tissue surrounding the basihyal are conserved across all toxotid species examined (Fig. 5C–5K). When moving across the basihyal from the posterior to anterior aspect, the posterior elevation of the basihyal descends to the middle of the element and a concave or trough-like region. This concave region of the basihyal then ascends to the anterior aspect of the element, which is flattened and plate-like. The lateral aspects of the basihyal ascend from the concave region before quickly descending immediately before the lateral margins of the basihyal. All toxotids have a prominent keel on the ventral margin of the basihyal, extending from the anterior margin to near the posterior margin of the element. This keel's maximum depth is near the latter  $\frac{1}{4}$  of the basihyal length before quickly ascending near the posterior aspect of the basihyal and near where the element contacts the first basibranchial. These keels may be laterally flanked by fossae or ridges of bone that serve as attachment points for soft tissue that surrounds the basihyal. While many aspects of the basihyal are conserved, variation in the amount of tissue surrounding the basihyal, position of the basihyal rostral cartilaginous cap, and the location in which the basihyal obtains its maximum width is present across species of archerfishes. The soft tissue surrounding the

basihyal is robust and forms a smooth and gasket-like rim in *Protoxotes lorentzi* and species of *Toxotes*. However, *P. lorentzi* possess a narrow rim of soft tissue that is rounded and ventrally directed compared to the wide and dorsolaterally directed margin of tissue in *Toxotes*. *Protoxotes lorentzi* (Fig. 5E) possesses a robust basihyal that is somewhat tapering posteriorly in overall shape. The rostral cap of the element is well ossified, with only a slight rim of cartilage (i.e., alcian stained) that was ventrally displaced. The basihyal is broad overall anteriorly, with dentition present up to the margin, and the posterior margin is slightly concave mesially. *Toxotes sundaicus* possesses an ovoid basihyal that is not as broad anteriorly as *P. lorentzi*. The basihyal in *T. sundaicus* achieves its greatest width within the anterior  $\frac{1}{3}$  to  $\frac{1}{2}$  of the length of the element. While we could view the posterior margin of the element is straight to convex, we could not identify if the rostral cap of the basihyal was cartilaginous in the  $\mu$ CT scan of *T. sundaicus*. However, when examining two formalin-fixed and ethanol-preserved specimens under daylight LED light, the consistency, position, and appearance of the rostral aspect of the basihyal is consistent with other species of *Toxotes*. Therefore, we consider *T. sundaicus* (Fig. 5K) to possess a cartilaginous basihyal cap in line with the dorsal margin of the basihyal. A similarly shaped basihyal to *T. sundaicus* is found in *T. blythii*, *T. carpentariensis*,

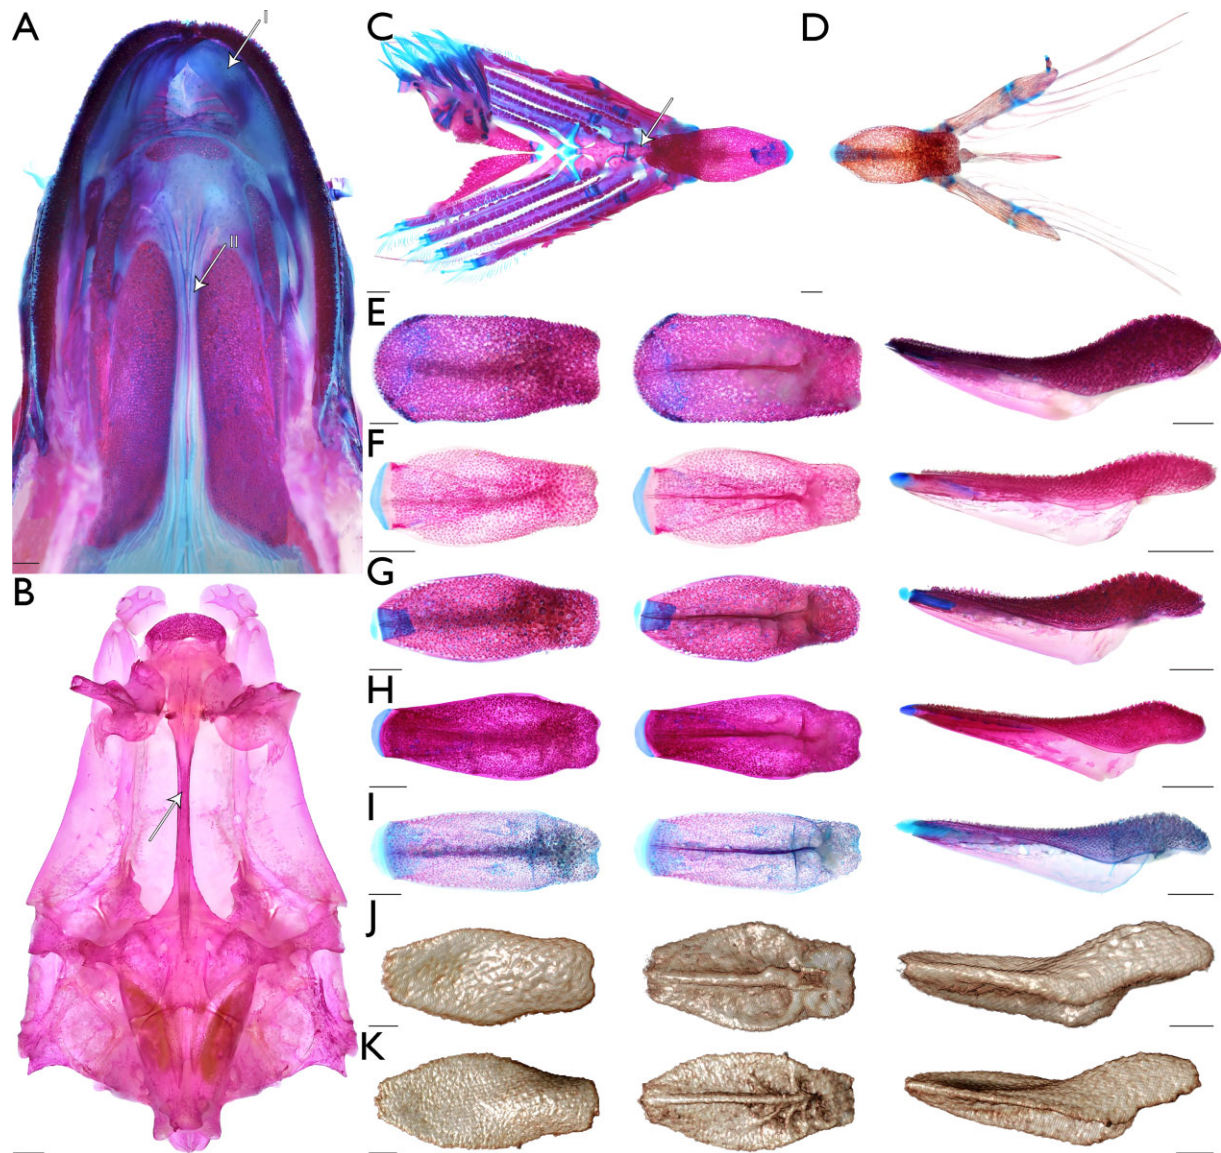

**Fig. 5** Morphological variation in archerfish oral structures. Images of stained specimens under white or daylight LED light. Images of  $\mu$ CT-scanned specimens generated using CTvox. Oral valves and palatal groove in dorsal aspect of oral cavity—(A) *Toxotes chatareus* (KUI 42697), arrow I points to left dorsal oral valve, arrow II points to palatal groove, ventral view, scale bar 1 mm. Groove in ventral aspect of parasphenoid (character state 5<sub>1</sub>)—(B) *T. jaculatrix* (FMNH 69510), arrow points to groove in parasphenoid, ventral view, scale bar 1 mm. Basihyal inserts above basibranchial one and covers the first basibranchial when viewing the branchial and hyoid arches dorsally (character state 50<sub>1</sub>)—(C) *T. chatareus* (KUI 42697), arrow points to basibranchial three, dorsal view, scale bar 1 mm; (D) *T. carpentariensis* (USNM 454834), dorsal view, scale bar 1 mm. Shape and anatomical variation in the archerfish basihyal (characters 40–45 and 49). For all images of an isolated basihyal, leftmost column shows the dorsal view of basihyal with anterior margin to the left; central column shows the ventral view of basihyal with anterior margin to the left; rightmost column shows the left lateral view of basihyal with anterior margin to the left; scale bar 1 mm—(E) *Prototoxotes lorentzi* (USNM 454833); (F) *T. blythii* (KUI 42173); (G) *T. chatareus* (UMMZ 236673); (H) *T. jaculatrix* (KUI 42174); (I) *T. oligolepis* (SU 29567); (J) *T. kimberleyensis* (WAM P.2620–001); (K) *T. sundaicus* (ZRC 42270).

*T. chatareus*, and *T. kimberleyensis* (Fig. 5D, 5F–5G, 5J, and 5K), which have an ovoid element that achieves its greatest width within the anterior  $\frac{1}{3}$  to  $\frac{1}{2}$  of the length of the element. While the basihyal in these species have a cartilaginous rostral cap that is in line with the dorsal margin of the element, basihyal dentition is absent

from the anterior margin of the ossified element in *T. blythii* and *T. carpentariensis*. For *T. kimberleyensis*, we could not observe the extent of the basihyal dentition in the  $\mu$ CT scan or under polarized light and further investigation is needed for this character. The basihyal in *T. jaculatrix* and *T. oligolepis* (Fig. 5H and 5I) obtains



its greatest width posteriorly to medioposteriorly when compared to other species of *Toxotes*, with the greatest width of the element obtained within the posterior  $\frac{1}{3}$  of the element's length. In *T. jaculatrix* and *T. oligolepis*, the dentition on the basihyal reaches the anterior margin of the ossified element. A cartilaginous rostral cap was observed in the cleared-and-stained specimens of *T. jaculatrix* and *T. oligolepis*, and it was in line with the dorsal margin of the basihyal. Additionally, the posterior margin of the basihyal in *T. jaculatrix* and *T. oligolepis* is concave and like other archerfish species.

## Discussion

### Species of archerfishes and nomenclature

The genus *Toxotes* was described by Cloquet (1816) and Cuvier (1816; see Kottelat, 2013), with the type species of *Sciaena jaculatrix* Pallas 1767 by monotypy, and most synopses have included all species of archerfishes in a single monogeneric family. While the taxonomy of the Toxotidae has been largely stable, a second genus of archerfish and several new species have been named, including three taxa recently described by Kottelat and Tan (2018). The first analyses in our study, which exclusively used DNA-based characters in the 22-terminal dataset, tested the species limits within the Toxotidae, recovering a monophyletic family with five groups of archerfish (Fig. 2). Our sampling of *Toxotes* from Asia and Oceania included *T. blythii* (three individuals), *T. chatareus* (three individuals), *T. jaculatrix* (two individuals), *T. mekongensis* (one individual), and *T. siamensis* (two individuals). These individuals were collected from disparate localities, including Cambodia, Malaysia, Thailand, and Vietnam (see Fig. 2). While samples of *T. blythii* and *T. jaculatrix* formed reciprocally monophyletic groups, the remaining samples from Asia and Oceania were found in a single clade that included three described species. *T. mekongensis* and *T. siamensis* were recently described as distinct species based on pigmentation and squamation, among other measurements (Kottelat and Tan, 2018), but genetic data was not included with their description. Our results from the 22-terminal analyses find *T. mekongensis* and *T. siamensis* in the same lineage as *T. chatareus* from Asia. Samples from these taxa differed by at most eight bps at the COI locus, compared to the >60 bp differences between these samples and other species of archerfishes. In addition to the genetic similarity among *T. chatareus*, *T. mekongensis*, and *T. siamensis*, we found inconsistencies in the pigmentation patterns for *T. mekongensis* and *T. siamensis* and few internal morphological characters that differentiated these taxa from *T. chatareus*. One of the diagnostic features of *T. siamensis* is the shape and elongation of

the second vertical pigmentation area along the flank, along with a large black spot above the anterior-half of the anal-fin base (Kottelat and Tan, 2018). We found several specimens of *T. siamensis* that inconsistently possessed the black spot above the anal-fin base between the left and right flanks (Fig. 6A) in addition to variation in the shape of the second pigmentation area on the flank. This pigmentation inconsistency was further confounded by the overall variability in pigmentation among specimens of *T. chatareus*, *T. mekongensis*, and *T. siamensis* from Asia and Oceania, which can be seen in Fig. 6, including those caught in the same location (Fig. 6F–6H). Finally, an individual from Lake Argyle of the Australian Ord River system, which resembles the pigmentation pattern of *T. siamensis* from Asia and Oceania, is shown by Merrick and Schmida (1984, fig. 225). These authors briefly discuss pigmentation-pattern variation within *Toxotes*, highlighting that pigmentation may change in a single individual due to stress and/or light availability (Merrick and Schmida 1984, figs. 223 and 224), a trait authors of this study have observed in *T. carpentariensis* and *T. chatareus*. Although pigmentation is currently an important character for differentiating species of archerfishes, we caution the use of these traits as diagnostic at the species level going forward. Based on the genetic and morphological data collected in this study, we treat *T. mekongensis* and *T. siamensis* as junior subjective synonyms of *T. chatareus*.

Our sampling of Australian archerfishes included six individuals from both Western Australia and the Northern Territory (see Fig. 2). Of these six samples, five were identified as *T. chatareus* based on lateral-line counts and pigmentation (see Allen, 1978, 2004). These five samples were recovered in a single clade separate from all other species of *Toxotes*. We were surprised by this finding because we were unable to find consistent external morphological features, including lateral-line scale counts or pigmentation, that separated these samples from *T. chatareus* collected in Asia and Oceania. While Allen (1978) notes that speciation may be occurring among the populations of *T. chatareus* in Australia and New Guinea based on fin-spine morphology, we did not find consistent differences in spine morphology between specimens collected from Asia and Oceania and those from Australia and New Guinea. While some differences occur in the length of the pelvic axillary “scale” between these two lineages, additional research is needed to find diagnostic morphological characters to differentiate these two lineages of *Toxotes*. A current synonym of *T. chatareus* is *T. carpentariensis* Castelnau 1878, which was described from a single adult specimen in the Norman River, Queensland, Australia. The description of this taxon is brief, and the holotype was

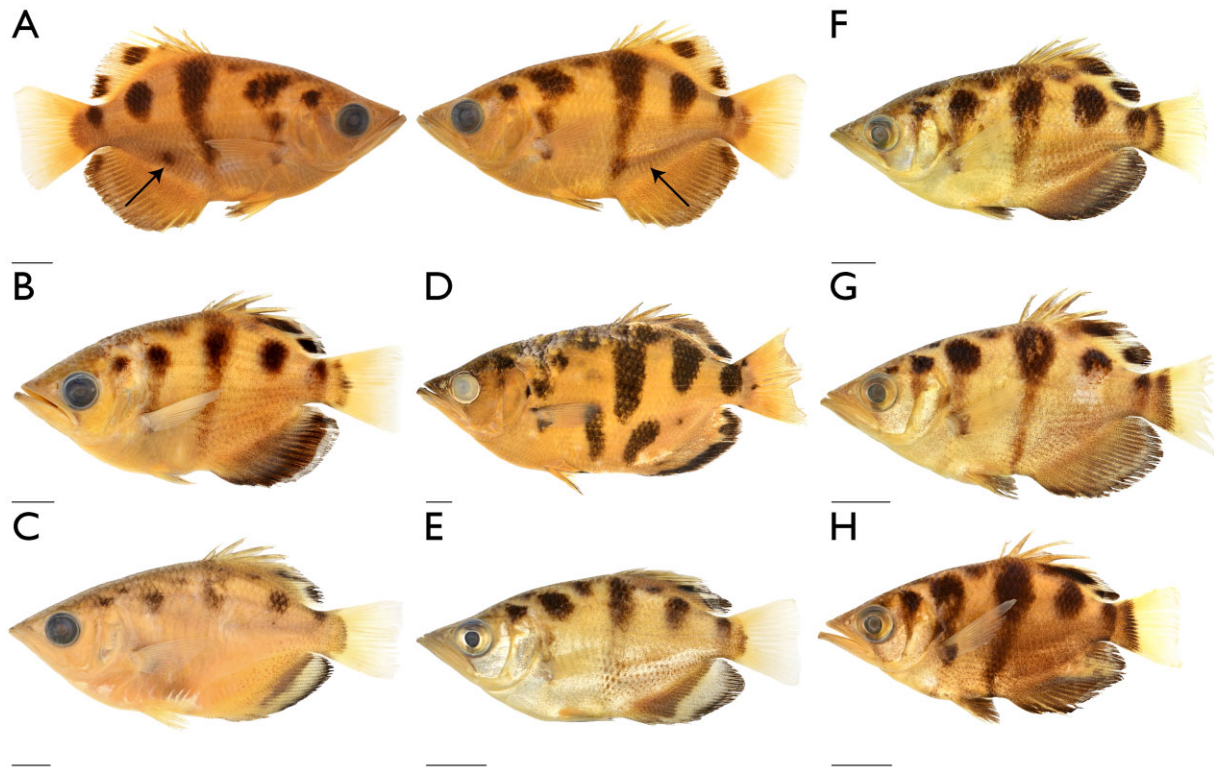

**Fig. 6** Variation in flank pigmentation among *Toxotes chatareus* collected in Asia and Oceania. Images of whole ethanol specimens under white or daylight LED light. Scale bars 1 cm. (A) UMMZ 236673, arrow points to presence and absence of pigmentation spot above anal fin on each flank, from Thailand, right lateral view and left lateral view; (B) CAS 97101, from Laos, left lateral view; (C) UF 241575, from Vietnam, left lateral view; (D) CAS 93958, from Thailand, left lateral view; (E) UMMZ 241226, from Vietnam, left lateral view; (F) UMMZ 232688, from Cambodia, left lateral view; (G) UMMZ 232688, from Cambodia, left lateral view; (H) UMMZ 232688, from Cambodia, left lateral view.

examined by Allen (1978), who concluded that the species was synonymous with *T. chatareus* from the Kimberley region of Western Australia and the Gulf of Carpentaria drainage system. Based on geography and genetic differences to *T. chatareus* from Asia and Oceania, we treat these southern samples as *T. carpentariensis*.

Previous researchers debated whether *T. lorentzi* is a member of the genus *Toxotes* or in a different genus, *Protoxotes*. Whitley (1950:244) placed the taxon in the genus *Protoxotes* to represent the “most primitive” species of archerfish based on the following combination of characters: absence of lateral pigmentation along the flank, straight lateral line along the flank, small size of scales, anterior position of the dorsal fin, and a more elongate body. However, subsequent authors (Taylor, 1964; Allen, 1978) placed the taxon within the genus *Toxotes*, which is the current generic designation. The results from our analyses recover *T. lorentzi* as the sister taxon to all other species of archerfishes based on both genetic and morphological traits. Therefore, we resurrect the genus *Protoxotes* Whitley 1950 for this taxon. In the following paragraphs, we discuss the inter- and

intra-relationships of the archerfishes organized by the topology we recover in our 13-terminal analysis. In each of these sections, we highlight one or more morphological features that optimize in support of the relationships we recover.

### Monophyly of the Toxotoidei

With the refined taxonomy of archerfishes, our 13-terminal analysis combined discrete morphological characters and genetic data to recover a hypothesis of relationships for the Toxotidae. Our combined analysis recovers a monophyletic Toxotidae within the Toxotoidei, sister to *Leptobrama muelleri* (Figs. 3 and 4) supported by 22 unambiguously optimized morphological character states and DNA-sequence data. The morphological study by Tominaga (1965) highlighted several similarities between the Leptobramidae and the Toxotidae, and beachsalmons have been recovered as the sister lineage of archerfishes in most DNA-based datasets when representatives of both families have been included (e.g., Betancur-R. et al., 2013a, 2013b, 2017; Harrington et al., 2016).

The combined analysis of Girard et al. (2020) similarly recovered the Leptobramidae as the sister group to the Toxotidae supported by 14 morphological characters and DNA-sequence data. Five of the 14 characters supporting the Toxotoidei in Girard et al. (2020) also optimize in support of the suborder in this study (Fig. 4), including ankylosed endopterygoid teeth (their character state 40<sub>1</sub>, our character state 31<sub>1</sub>), posteriorly placed basihyal (their character state 63<sub>1</sub>, our character state 50<sub>1</sub>), ventral processes of coracoid and cleithrum distinctly separate (their character state 114<sub>1</sub>, our character state 66<sub>1</sub>), a vertically oriented first anal-fin pterygiophore (their character state 153<sub>2</sub>, our character state 83<sub>1</sub>), and an equal number or more anal-fin rays versus dorsal-fin rays (their character state 165<sub>1</sub>, our character state 89<sub>1</sub>). Among the remaining nine characters that optimize in support of the Toxotoidei in Girard et al. (2020) but do not optimize in support of the clade in our study, five were included and coded in our matrix (characters 13, 32, 64, 91, and 98) but did not optimize unambiguously in our analysis. This is likely due to differences in outgroup taxon sampling between the two studies. We also modified characters 135 and 136 from the study by Girard et al. (2020; our characters 75 and 76) to be more explicit in the homology of spines associated with dorsal-fin pterygiophores. We recover 15 additional characters that support a sister-group relationship between the Leptobramidae and the Toxotidae (Fig. 4). Nine of these 15 characters are described in this study (character 5, 9, 34, 41, 46, 49, 70, 74, and 95), and two characters are described in Allen (1978, 2004; our characters 73 and 78). The nine characters described in this study that support the monophyly of the Toxotoidei include: ventral aspect of parasphenoid containing a dorsally directed groove (character state 5<sub>1</sub>), posterior margin of the metapterygoid having a flange-like extension that overlaps the hyomandibular ventral arm (character state 34<sub>1</sub>), a basihyal that is ovoid in shape when viewed dorsally (character state 41<sub>1</sub>), presence of a ventral basihyal keel (character state 49<sub>1</sub>), and presence of a protuberance on the medioposterior margin of the cleithrum (character state 70<sub>1</sub>). In carangiform taxa examined outside of the Toxotoidei sampled in this study and in Girard et al. (2020), the posterior margin of the metapterygoid is largely simple. Some families (e.g., Centropomidae, Latidae) include species that possess a small rhomboid-shaped flange that may extend slightly into the margin of the hyomandibular ventral arm (see Greenwood et al., 1976). However, members of the Leptobramidae and the Toxotidae possess a flange-like extension of bone that originates from the posterior margin of the metapterygoid and extends posteriorly, completely overlapping the ventral arm of the hyomandibular and often overlapping elements

of the opercular series (Fig. 7; Elshoud and Koomen, 1985, fig. 2). The flange typically possesses a broad base and tapers to a distal point. In both the Leptobramidae and the Toxotidae, the flange supports soft tissue leading to the pseudobranch (Fig. 7C), with this flange also serving as an attachment point for the posterior portion of the *adductor arcus palatini* in archerfishes (Fig. 7D). While we did not observe this flange in any other taxa sampled in this study beyond members of the Leptobramidae and the Toxotidae, a flange that is similar in position and extension is present in some members of the Lutjanidae (Johnson, 1980, figs. 29 and 30), but the flange in those taxa appear rounded distally compared to the tapering flange seen in members of the Toxotoidei. In addition to the metapterygoid flange, four characters that support the monophyly of the Toxotoidei relate to their oral structures. We find an indentation or groove in the ventral aspect of the parasphenoid and dorsal to the location of the palatal groove in members of the Toxotidae (Fig. 5A), as well as *Leptobrama muelleri* (character state 5<sub>1</sub>). We also find three basihyal characters—basihyal ovoid in shape (character state 41<sub>1</sub>), basihyal bearing teeth (character state 43<sub>1</sub>), and presence of a basihyal keel (character state 49<sub>1</sub>)—that optimize in support of the Toxotoidei (Figs. 4, 5, and 7). Girard et al. (2020, figs. 7 and 8) showed a number basihyal shapes among carangiform taxa, which range from a slightly rounded basihyal (e.g., *Coryphaena*, *Oligoplites*) to a largely rectangular or hourglass shaped basihyal when viewed from the dorsally (*Achirus*, *Trachurus*). However, the basihyal of these taxa do not possess a keel-like extension along the ventral margin of the element. A distinct and ventrally directed keel on the basihyal was only found among members of the Toxotoidei (Figs. 5 and 7). The keel extended along most of the length of the basihyal in species of *Leptobrama*, *Protoxotes*, and *Toxotes*, becoming progressively deeper posteriorly. The keel ends in a cup-like dorsally directed indentation in all members of the Toxotoidei, which is where the first basibranchial inserts. Mok and Shen (1983) illustrated a similar basihyal keel in members of the Chaetodontidae (figs. 12P and 12Q) and Carpenter and Johnson (2002) noted a ventral basihyal keel in members of the Lethrinidae and *Pentapodus* (fig. 7A, their character state 35<sub>1</sub>). We examined the basihyal of *Forcipiger flavissimus*, *Heniochus diphreutes*, and *Lethrinus harak* (see Material examined) and, while these taxa do have basihyal keels, the keels differ from those in members of the Toxotoidei. The basihyal keel in chaetodontids extends along the entire ventral length of the basihyal, ascending as it reaches the posterior margin and does not end in a cup-like indentation (Fig. 7). Additionally, the keel in *Lethrinus* is restricted to the anterior part of

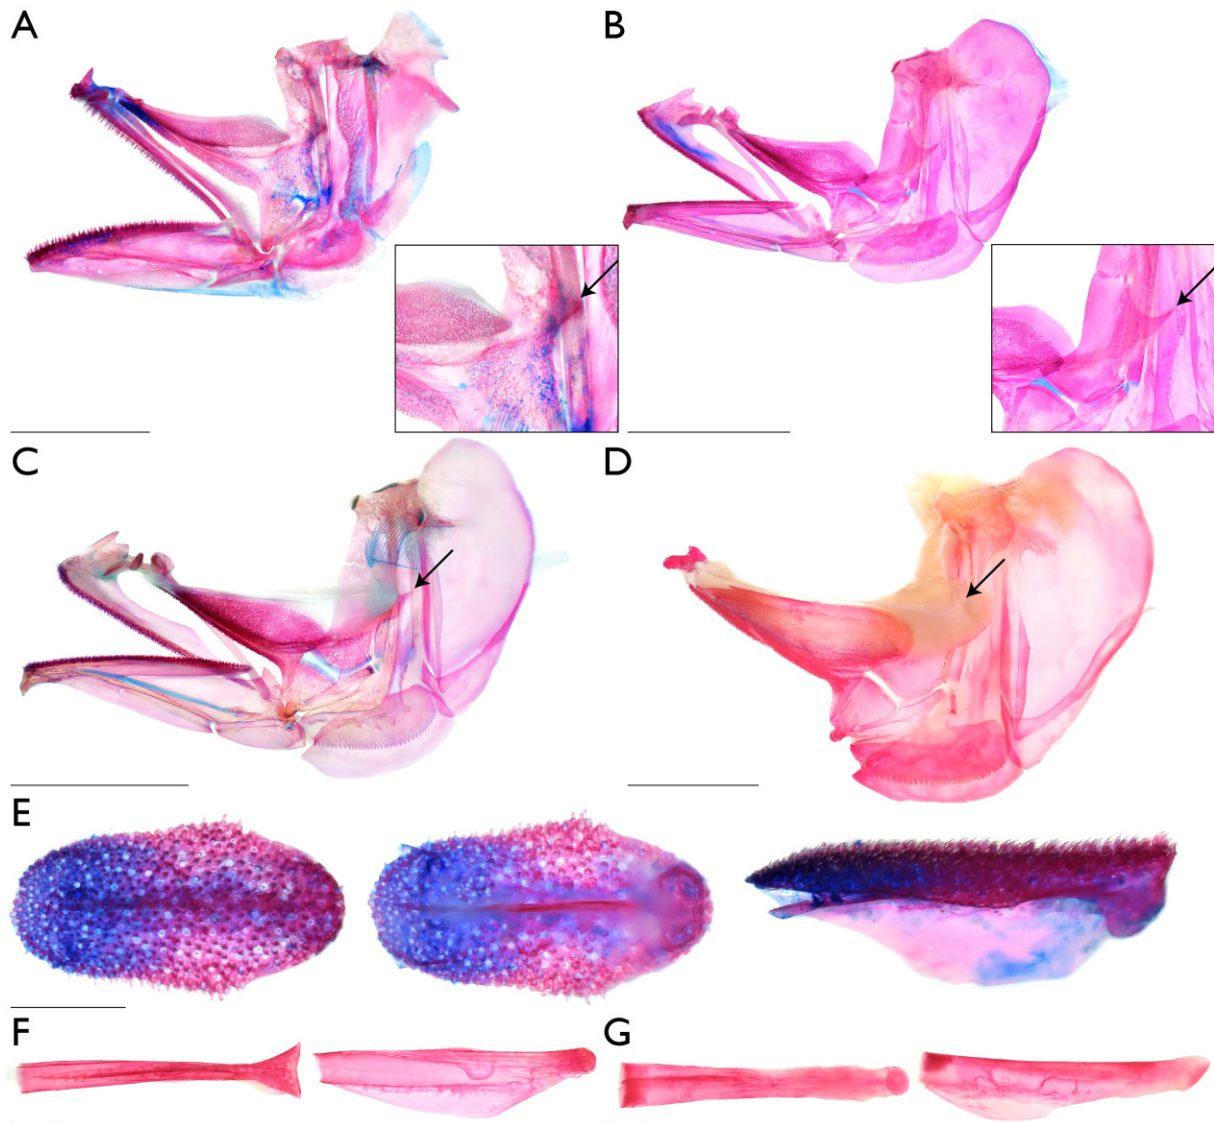

**Fig. 7** Morphological characters that support the Toxotoidei. Images of stained specimens under white or daylight LED light. Posterior margin of the metapterygoid with a flange-like extension that overlaps the hyomandibular ventral arm (character state 34<sub>1</sub>)—(A) *Leptobrama muelleri* (KUI 41406), box with arrow points to flange-like extension, medial view of suspensorium, scale bar 1 cm; (B) *Toxotes jaculatrix* (KUI 42174), box with arrow points to flange-like extension, medial view of suspensorium, scale bar 1 cm; (C) *T. chatareus* (UMMZ 236673), arrow points to pseudobranch tissue supported by flange-like extension, medial view of suspensorium, scale bar 1 cm; (D) *T. jaculatrix* (USNM 331437), arrow points to posterior portion of *adductor arcus palatini* supported by flange-like extension, medial view of suspensorium, scale bar 5 mm. Leptobramid basihyal for comparison with basihyal in toxotids (Fig. 5). The leftmost image shows the dorsal view of basihyal, the central image shows the ventral view of basihyal, rightmost image shows the left lateral view of basihyal (characters 40–45 and 49)—(E) *Leptobrama muelleri* (KUI 41406), scale bar 1 mm. Comparative basihyal keels in taxa outside the Toxotoidei—(F) *Forcipiger flavissimus* (USNM 166647), left image shows the ventral view of basihyal, right image shows the left lateral view of basihyal, scale bar 1 mm; (G) *Lethrinus harak* (USNM 290483), left image shows the ventral view of basihyal, right image shows the left lateral view of basihyal, scale bar 1 mm.

the basihyal rather than continuing along the majority of the length as seen in members of the Toxotoidei (Fig. 7). Although keels can be found on the basihyal of fishes outside of the Toxotoidei, there are morphological differences between these keels compared to those in the Leptobramidae and the Toxotidae.

### Monophyly of the Toxotidae

We recover a monophyletic Toxotidae supported by 18 morphological characters (Figs. 3 and 4), including, but not limited to, the presence of a parasphenoid keel (character state 6<sub>1</sub>), maxillary largely uniform in depth

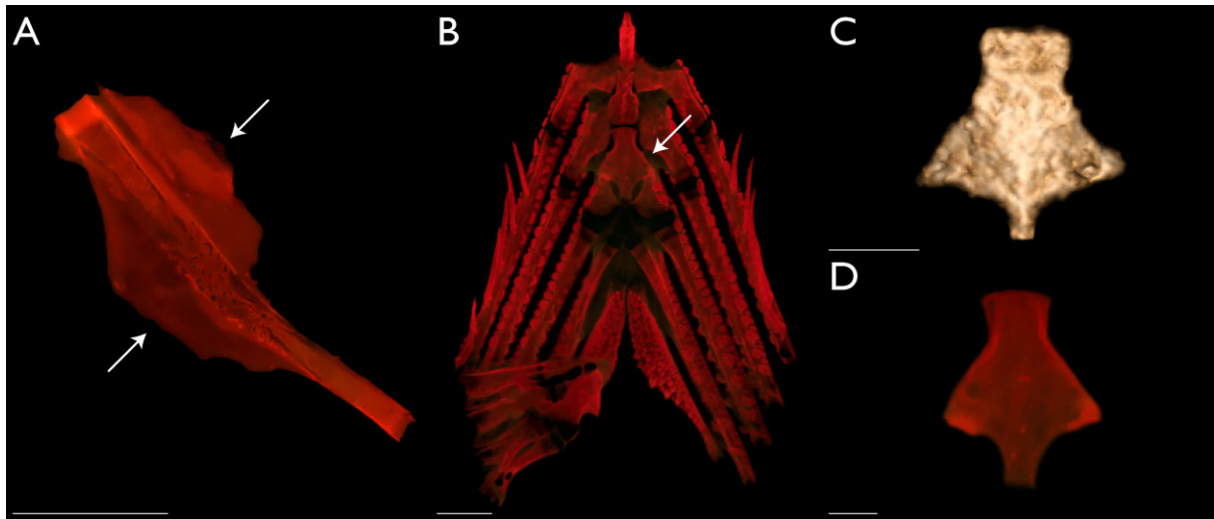

**Fig. 8** Morphological characters that support the Toxotidae. Images A, B, and D of cleared-and-stained specimens autofluorescing under royal blue LED light (see Materials and methods). Image C generated in 3D Slicer using  $\mu$ CT-scanned specimens. Lamellar expansions on the dorsal and ventral margins of the symplectic (character states 35<sub>1</sub> and 36<sub>1</sub>)—(A) *Toxotes jaculatrix* (KUI 42174), arrows point to expansions, lateral view, scale bar 1 mm. Lateral expansions of the third basibranchial (character state 53<sub>1</sub>)—(B) *T. chatareus* (UMMZ 232688), arrow points to expansion, dorsal view, scale bar 1 mm; (C) *Protoxotes lorentzi* (USNM 406792), dorsal view, scale bar 1 cm; (D) *T. chatareus* (UMMZ 232688), dorsal view, scale bar 1 mm.

throughout length (character state 24<sub>1</sub>), presence of flange-like lamellar expansions on the dorsal and ventral margins of the symplectic (character states 35<sub>1</sub> and 36<sub>1</sub>; Fig. 8), and the lateral expansion of the third basibranchial (character state 53<sub>1</sub>; Fig. 8). Gushiken (1988) described a keel on the parasphenoid posterior to the vomer in members of the Carangoidei (i.e., Carangidae and Coryphaenidae) and illustrated a ventral expansion of the parasphenoid underneath the otic region of the neurocranium (his fig. 2). In this study, we find a similar ventral expansion of the parasphenoid in all members of the Toxotidae examined (character state 6<sub>1</sub>). The keel extends posteriorly, underneath the lateral arms of the parasphenoid, before becoming reduced approximately mid-way through the prootic. Aside from archerfishes, a parasphenoid keel is also present in *Lepomis cyanellus* among the taxa examined. Given that previous authors have noted the presence of a parasphenoid keel in other fishes, further investigation is needed to understand the distribution of this character across members of the Carangiformes and perch-like fishes more broadly. Another character supporting the monophyly of archerfishes relates to the depth of the posterior margin of the maxilla. In other members of the Carangiformes (e.g., Carangidae, Latidae, Polyneimidae; Greenwood et al., 1976; Girard et al., 2020), the maxilla becomes dorsoventrally deeper in the posterior aspect of the element. A different condition exists in the archerfishes, in which the maxilla is largely uniform

in its depth throughout its length (character state 24<sub>1</sub>). We also recover the presence of lamellar expansions on the symplectic in support of the monophyly of the Toxotidae (Fig. 8). The symplectic is often a rod-like element of the hyopalatine arch that joins the quadrate with the hyomandibular and articulates with the interhyal. Girard et al. (2020) described variation in the overall length of the element as well as lamellae extending from it. Two characters relating to the lamellar expansions on the dorsal and ventral margins of the symplectic (character states 35<sub>1</sub> and 36<sub>1</sub>) optimize in support of the monophyly of the Toxotidae. The dorsal margin of the symplectic possesses a rounded lamellar expansion that extends dorsally, overlapping the ventral margin of the metapterygoid. The dorsal expansion begins approximately halfway up the length of the symplectic and continues to the dorsal end of the element. The ventral margin possesses a lamellar expansion of similar size, though it reaches its greatest length at the midline of the element. A similar dorsal lamellar expansion of the symplectic was not found outside of the Toxotidae among taxa sampled, but *Lates calcarifer* possesses a similar ventral expansion in both size and length to toxotids. The final character we highlight that supports toxotid monophyly is the shape of the third basibranchial when viewed dorsally (Fig. 8). In many carangiform and perch-like fishes, the third basibranchial is an elongate rectangular or hourglass shaped element (Girard et al., 2020). However, members of the

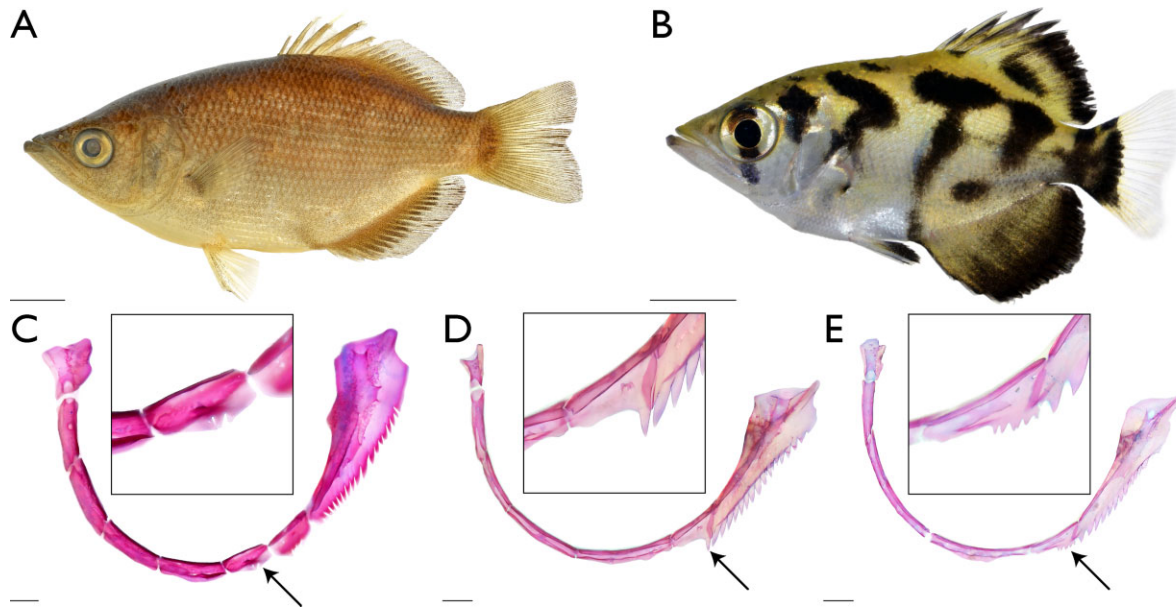

**Fig. 9** Morphological features that differ between *Prototoxotes* and *Toxotes*. Images of whole or cleared-and-stained specimens under white or daylight LED light. Pigmentation absent along flank—(A) *P. lorentzi* (USNM 406792), left lateral view, scale bar 1 cm. Pigmentation present along flank—(B) *T. blythii* (KUI 42173), left lateral view, scale bar 1 cm. Serrations on the ventral margin of circumorbitals two and three (characters 14, 15, and 16)—(C) *P. lorentzi* (USNM 454833), arrow points to third circumorbital serrations, lateral view, cutout is close-up image of third circumorbital, scale bar 1 mm. Serrations on the ventral margin of circumorbital two (characters 14, 15, and 16)—(D) *T. chatareus* (UMMZ 236673); (E) *T. oligolepis* (SU 29567), arrow points to second circumorbital serration, lateral view, cutout is close-up image of second circumorbital, scale bar 1 mm.

Toxotidae sampled in this study have lateral expansions of the third basibranchial, giving the appearance of the capital letter “T” when viewed dorsally. The lateral expansions on the third basibranchial typically covers the dorsal margin of the third hypobranchial processes but otherwise does not interact with any other branchial elements.

#### Intrarelationships of the Toxotidae

Our combined analysis of the 13-terminal dataset recovers *P. lorentzi* as the sister group to the remaining members of the Toxotidae, with 11 characters supporting the monophyly of *Toxotes* (Figs. 3 and 4). Although this taxon had yet to be included in a phylogenetic analysis, Weber and de Beaufort (1936) and Whitley (1950:244) suggested this species is the “most primitive” archerfish based on a combination of characters (see above), with Whitley (1950) describing the genus *Prototoxotes*. However, subsequent authors (Taylor, 1964; Allen, 1978) continued to place the taxon in *Toxotes*. We corroborate the findings of Weber and de Beaufort (1936) and Whitley (1950) regarding lateral-line shape, flank pigmentation, and scale size for this taxon (Figs. 9 and 10). We additionally find a set of characters that diagnose *P. lorentzi*, including serrations on the ventral aspect of the third circumorbital

(character 16<sub>1</sub>) and a short pelvic axillary scale that extends no longer than  $\frac{1}{3}$  the length of the pelvic spine (character 97<sub>0</sub>). While all archerfishes examined in this study exhibit serrations along the lachrymal and second circumorbital, *P. lorentzi* possesses multiple serrations along the ventral margin of the third circumorbital. This condition is different from other archerfishes, which lack serrations on the third circumorbital (Fig. 9). This character, along with others in this study, and those highlighted by Weber and de Beaufort (1936) and Whitley (1950), show the number of differences between *P. lorentzi* and other species of archerfishes.

The monophyly of a restricted *Toxotes* is supported by 11 morphological characters. These include a weak postcoracoid process with a shallow indentation (character state 69<sub>0</sub>; Fig. 10) and an interrupted lateral line (character state 100<sub>1</sub>; Fig. 10). Positioned on the dorsoposterior angle of the coracoid and typically directly underneath the ventralmost pectoral radial, the postcoracoid process varies in presence and absence as well as shape among carangiform fishes as noted by Girard et al. (2020, characters 116 and 117). While all archerfishes sampled in this study have a postcoracoid process, the overall shape of this process varies, with species of *Toxotes* possessing a weak process that

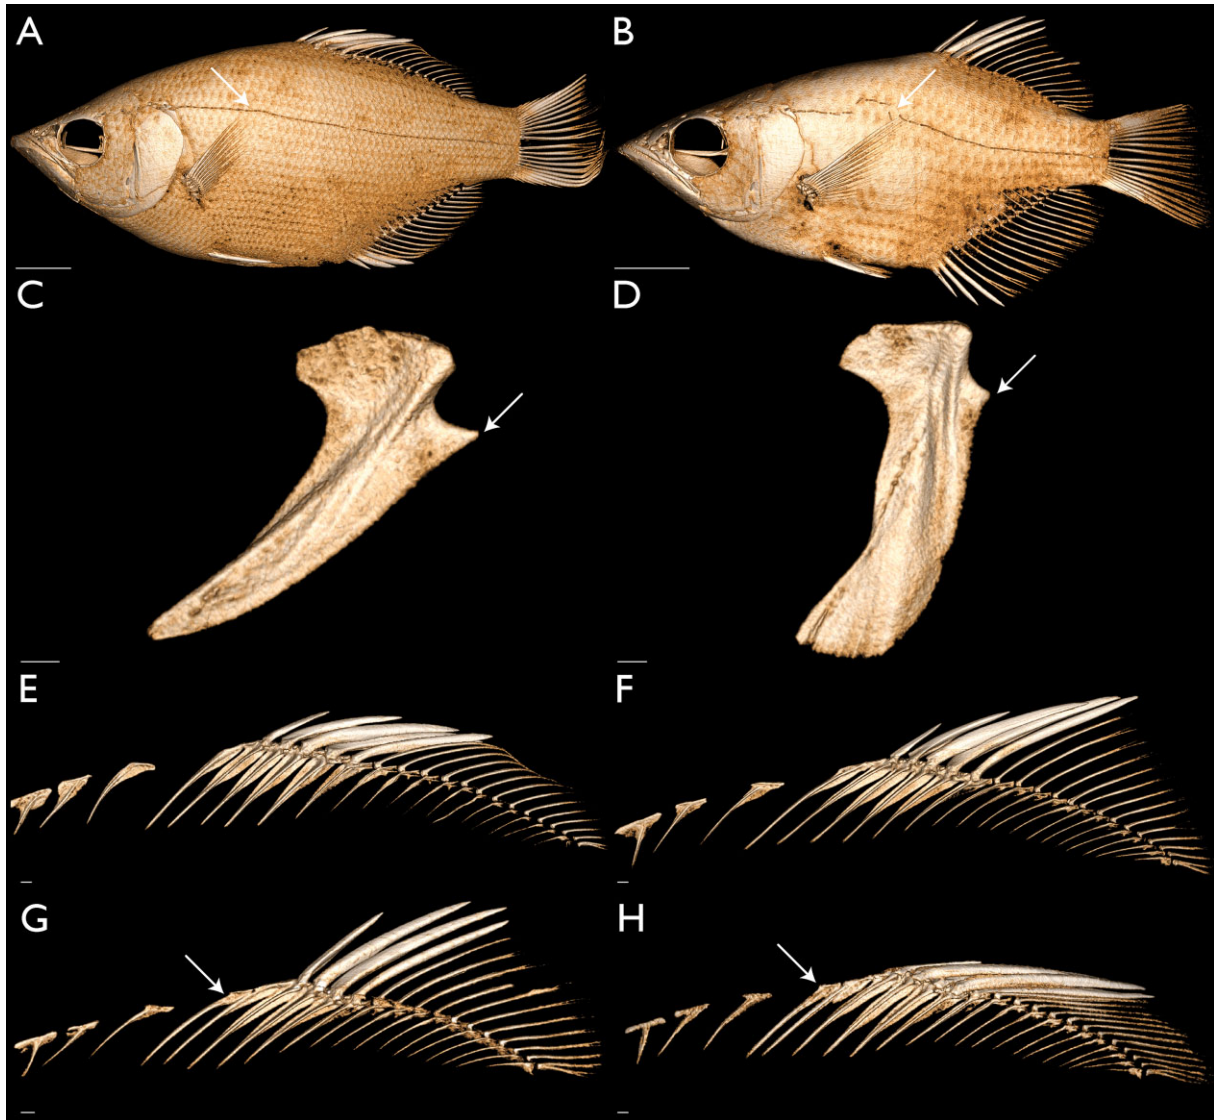

Fig. 10 Morphological variation that supports the monophyly and relationships of *Toxotes* (see text). Images generated in 3D Slicer using  $\mu$ CT-scanned specimens. Lateral-line canal straight above pectoral fin (character state 99<sub>0</sub>) and confluent (character state 100<sub>0</sub>)—(A) *Protoxotes lorentzi* (USNM 406792), arrow points to lateral line, left lateral view, scale bar 1 cm. Lateral-line canal arched above pectoral fin (character state 99<sub>1</sub>) and interrupted (character state 100<sub>1</sub>)—(B) *T. jaculatrix* (SU 15516), arrow points to lateral line, left lateral view, scale bar 1 cm. Postcoracoid process strong with deep indentation dorsally (character state 69<sub>1</sub>)—(C) *P. lorentzi* (USNM 406792), left lateral view of left coracoid, scale bar 1 mm. Postcoracoid process weak with shallow indentation dorsally (character state 69<sub>0</sub>)—(D) *T. carpentariensis* (FMNH 63925), left lateral view of left coracoid, scale bar 1 cm. Absence of a spineless proximal-middle dorsal pterygiophore (character state 76<sub>0</sub>)—(E) *P. lorentzi* (USNM 406792), left lateral view of left coracoid, scale bar 1 mm; (F) *T. chatareus* (CAS 94720), left lateral view of left coracoid, scale bar 1 mm. Presence of a spineless proximal-middle dorsal pterygiophore (character state 76<sub>1</sub>)—(G) *T. jaculatrix* (SU 15516), arrow points to pterygiophore, left lateral view of left coracoid, scale bar 1 mm; (H) *T. oligolepis* (SU 29567), arrow points to pterygiophore, left lateral view of left coracoid, scale bar 1 mm.

extends a small to moderate amount from the coracoid (Fig. 10). Taxa with a weak process also have a shallow indentation dorsal to the process (Fig. 10D). However, *P. lorentzi* has a strong postcoracoid process with a deep dorsal indentation (Fig. 10C) similar to other carangiform and non-carangiform taxa sampled. A weak postcoracoid process with a shallow indentation (char-

acter state 69<sub>0</sub>), along with 10 other morphological characters, support the monophyly of *Toxotes*.

Within *Toxotes*, we recover *T. sundaicus* as the sister taxon to the remaining species in the genus (Figs. 3 and 4). However, this placement is based solely on morphological data because specimens of this taxon were not available for sequencing. *Toxotes sundaicus*, which

is restricted to Borneo and Sumatra, is similar morphologically to the widespread *T. chatareus*. We do not currently dispute the validity of this taxon, but encourage subsequent researchers to sample *T. sundaicus* using DNA-sequence data for comparison and analysis. The next clade of archerfishes we recover in our combined analysis is *T. chatareus* sister to a clade consisting of *T. blythii*, *T. carpentariensis*, *T. jaculatrix*, *T. kimberleyensis*, and *T. oligolepis*. This clade is supported by three morphological characters, including a large oculomotor foramen (character state 4<sub>1</sub>). We observed a foramen of various size and relative position in the anterior aspect of the prootic in many of the taxa sampled. We interpret this foramen to be the oculomotor foramen based on the illustrations in Patterson (1970, Fig. 5B), as it is positioned between the lateral arms of the basisphenoid and the prootic. In addition to the differential presence and absence of the foramen, its size varies among the taxa sampled. A large oculomotor foramen (character state 4<sub>1</sub>) optimizes in support of a clade including *T. blythii*, *T. carpentariensis*, *T. chatareus*, *T. jaculatrix*, *T. kimberleyensis*, and *T. oligolepis*. Among the taxa examined outside of the *Toxotidae*, only *Perca flavescens* possesses similar state with respect to the size and position of this foramen. While further investigation into the homology and phylogenetic significance of this foramen is needed, a large oculomotor foramen supports the monophyly of *T. blythii*, *T. carpentariensis*, *T. chatareus*, *T. jaculatrix*, *T. kimberleyensis*, and *T. oligolepis*.

The next clade we recover in our 13-terminal analysis includes *T. carpentariensis* sister to a clade of *T. blythii*, *T. jaculatrix*, *T. kimberleyensis*, and *T. oligolepis* (Figs. 3 and 4). This clade is supported by only DNA data, as no morphological characters optimized unambiguously on this node. An ACCTRAN optimization finds two characters in support of this node, with one being the presence of two or more serrations on the ventral margin of circumorbital two (character state 15<sub>0</sub>). While this character may support the relationship of *T. blythii*, *T. carpentariensis*, *T. jaculatrix*, *T. kimberleyensis*, and *T. oligolepis*, this character state also occurs in *Protoxotes* and *Lates* among taxa sampled in this study. We interpret this character to be symplesiomorphic and further investigations are needed to better understand the relationship among *T. blythii*, *T. carpentariensis*, *T. jaculatrix*, *T. kimberleyensis*, and *T. oligolepis*.

The next clade we recover in our 13-terminal analysis includes *T. blythii* as the sister taxon to a clade of *T. jaculatrix*, *T. kimberleyensis*, and *T. oligolepis*, which is supported by one morphological character and DNA-sequence data (Figs. 3 and 4). The character that optimizes onto this node is the unequal dorsal and ventral

process-lengths on the lateral gill raker associated with the junction between the first epibranchial and first ceratobranchial (character state 60<sub>1</sub>). A lateral gill raker may be present and associated with the junction between the first epibranchial and first ceratobranchial. When present, this gill raker possesses both dorsal and ventral processes that emerge from the proximal aspect of the gill raker and interact with the epibranchial or ceratobranchial, respectively. The overall length of these processes is predominantly equal among taxa sampled in this study, except for *T. blythii*, *T. jaculatrix*, *T. kimberleyensis*, and *T. oligolepis*, where the dorsal process is reduced in length when compared to the ventral process.

We recover *T. kimberleyensis* as the sister group to a clade of *T. jaculatrix* and *T. oligolepis* in our combined analysis (Figs. 3 and 4). This clade is supported by two morphological characters, including between 25 and 32 lateral-line scales (character state 98<sub>0</sub>). *Toxotes jaculatrix*, *T. kimberleyensis*, and *T. oligolepis* possess the fewest number of lateral-line scales within the family, along with some specimens of *T. carpentariensis* and *T. chatareus* (see Allen, 1978, 2004; Kottelat and Tan, 2018). Within this clade, *T. jaculatrix* and *T. oligolepis* are recovered as sister taxa that are supported by five morphological characters, including the basihyal obtaining greatest width medioposteriorly (character state 42<sub>0</sub>), presence of a spineless proximal-middle dorsal pterygiophore (character state 76<sub>1</sub>, Fig. 10), and body elongate or largely elongate (character state 85<sub>0</sub>). As noted above, the basihyal is similarly shaped across species of *Toxotes*. However, the basihyal in *T. jaculatrix* and *T. oligolepis* (Fig. 5) is slightly different from other toxotids, as it obtains its greatest width within the posterior 1/3 of the element's length. Another character in support of this clade is presence of a spineless proximal-middle dorsal pterygiophore (character state 76<sub>1</sub>). While modifications to the dorsal fin have occurred in the evolutionary history of fishes, archerfishes possess a serial arrangement between dorsal-fin spines and pterygiophores, resulting in only one spine associating with each proximal-middle pterygiophore of the dorsal fin (Fig. 10E and 10F). However, *T. jaculatrix* and *T. oligolepis* exhibit a spineless proximal-middle pterygiophore (Fig. 10G and 10H) anterior to the first proximal-middle pterygiophore that bears a dorsal spine. Spineless proximal-middle pterygiophores were not observed in any other species of *Toxotes* examined.

#### Archerfish oral structures and the shooting mechanism

There are two hypotheses about the formation of the water jet archerfishes use to attack prey—the blowpipe



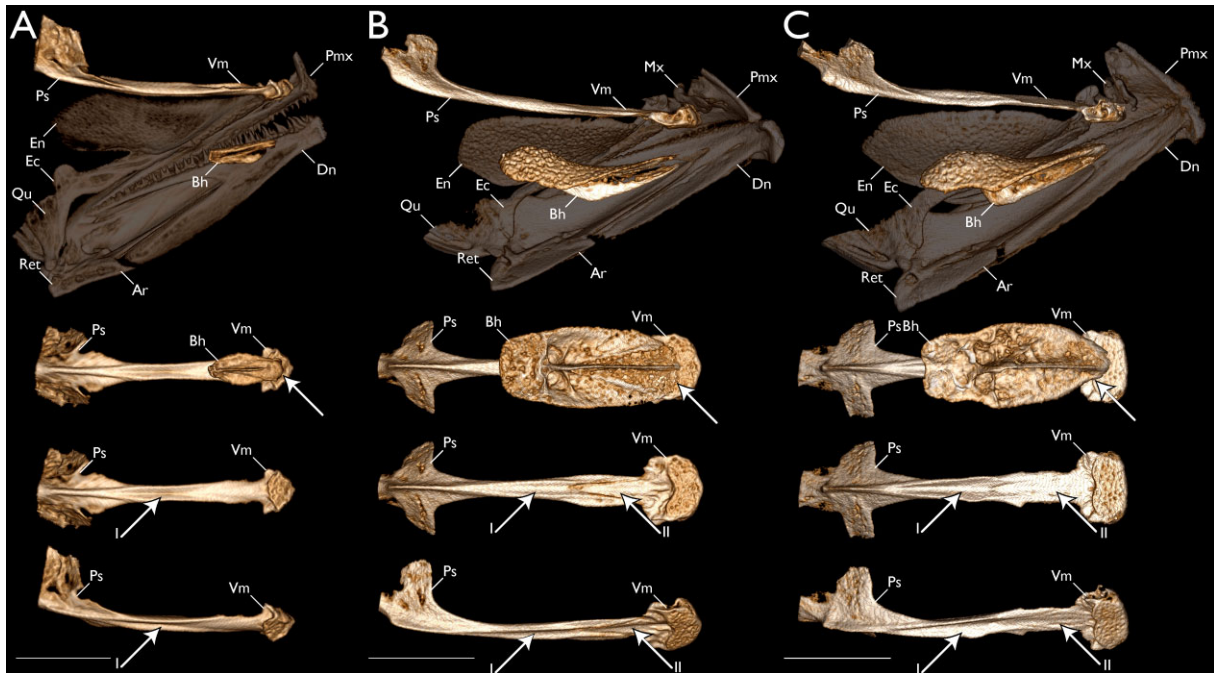

Fig. 11 Osteology and orientation of oral structures in Toxotoidei. Images generated in 3D Slicer using  $\mu$ CT-scanned specimens. Position of basihyal relative to groove in parasphenoid and vomerine tooth plate at resting position—first row, right lateral view. Basihyal position relative to groove in parasphenoid and vomerine tooth plate at resting position—second row, arrow points to tip of basihyal overlapping vomerine tooth plate, ventral view. Groove in ventral margin of parasphenoid, vomer, and mesial indentation of vomerine tooth plate—third and fourth rows, arrow I points to ventral groove in parasphenoid, arrow II points to ventral groove in vomer, ventral view. (A) *Leptobrama pectoralis* (QM I.27586). (B) *Protoxotes lorentzi* (USNM 406792). (C) *Toxotes carpentariensis* (FMNH 63925); scale bars all 5 mm. Abbreviations: Ar, articular; Bh, basihyal; Dn, dentary; Ec, ectopterygoid; En, endopterygoid; Mx, maxilla; Pmx, premaxilla; Ps, parasphenoid truncated posterior to lateral arms; Ret, retroarticular; Qu, quadrate; Vm, vomer.

and the pressure tank. That is, either these fishes rapidly change the volume of the buccal cavity, ejecting a stream of water, or pressurize the cavity until a valve releases the pressure, allowing the shot to emerge. Elshoud and Koomen (1985) found the blowpipe implausible because they found the ventral margin of the parasphenoid nearly straight, the groove in the soft tissue directed at the posterior margin of the vomer, and mismatch between the dorsal margin of the basihyal and ventral margin of the parasphenoid. We disagree with the finding that the ventral margin of the parasphenoid is nearly straight—there is a dorsally directed groove in not only soft tissue (i.e., palatal groove), but also in hard tissue, with the ventral aspect of the parasphenoid and vomer having grooves (Figs. 5 and 11). While we do not disagree that the hard- and soft-tissue grooves are directed at the vomerine tooth plate, we do not think this impacts the plausibility of the blowpipe hypothesis. A close examination of the soft tissue near the vomer shows a smooth ventrally sloping margin that leads toward the tooth plate (Figs. 5A and 11). This slope ends near the concave posterior margin of the vomerine tooth plate, allowing for a

largely flush margin between the palatal groove and the ventral margin of the vomer (Fig. 5A). Elshoud and Koomen (1985) also mention that there is a mismatch between the palatal groove and dorsal margin of the basihyal. However, when taking the orientation and dorsal topology of the basihyal into account, we find the most-elevated portion of the basihyal lies beneath the most pronounced portion of the parasphenoid groove (Fig. 11). Where the anterior portion of the basihyal overlaps the posterior  $\frac{1}{3}$  of the vomerine tooth plate, the basihyal is mesially concave, allowing for a small gap to be formed between the palatal groove, slope of the vomer, concave posterior margin of the vomerine tooth plate, and anteriorly concave dorsal margin of the basihyal (Figs. 5 and 11). These hard and soft-tissue structures support the plausibility of the blowpipe hypothesis. However, we cannot support or refute that the oral valves play a role in the shooting apparatus. We did observe an anterior and mesial aperture in both the upper and lower oral valves of *P. lorentzi*, *T. chatareus*, and *T. jaculatrix* (Fig. 5A), which is a different condition to the continuous oral valves found in *Lates*, *Leptobrama*, and *Nematistius*. However, the study by

Timmermans and Souren (2004) found that the shape of the shot is horizontally flat in cross section immediately after exiting from the archerfish mouth. They go on to state that this shape indicates that the shot passes over a horizontally flat aperture, not through a narrow aperture of the oral valves, before exiting the oral cavity. Other soft-tissue structures, such as those surrounding the basihyal, may also play a role in projecting water. The tissue associated with the basihyal may provide a gasket-like seal to prevent water from moving laterally or posteriorly when the basihyal is compressed against the palatal groove. Further studies are needed to test if the variation in basihyal shape and cartilaginous cap position, particularly the differences between *Protoxotes* and *Toxotes*, as well as if the oral valves or soft tissue surrounding the basihyal have any impact on the formation and projection of an archerfish shot.

### Evolution of archerfish oral structures

In examining the osteology of the archerfish sister group, the Leptobramidae, we were surprised to find it has relevant shooting features within the oral cavity. There is a soft-tissue palatal groove between the endopterygoid tooth patches, a groove in the ventral margin of the parasphenoid, and an ovoid basihyal with a ventral keel (Figs. 7 and 11). We also find the posterior flange associated with the metapterygoid in both leptobramids and toxotids, which in archerfishes supports the *adductor arcus palatini* and plays a role in the shooting mechanism (Fig. 7; Milburn and Alexander, 1976). However, we do not consider it likely that leptobramids shoot like archerfishes; the leptobramid basihyal lacks the posterior elevation (our character 40; see Figs. 5, 7, and 11) and is smaller than the basihyal of archerfishes. Furthermore, the ventral margin of the vomer and posterior margin of the vomerine tooth plate are convex in leptobramids, rather than possessing a groove or concavity seen in archerfishes (Fig. 11). Despite these differences, the resulting phylogeny and the characters suggest that the palatal groove, parasphenoid groove, keeled basihyal, and metapterygoid flange were present in the ancestors of the Toxotoidei lineage and are examples of exapted or co-opted traits for the pressurization of water through and out of the oral cavity in archerfishes. Exaptation is defined as the co-option of a character or trait toward a use that is different from the one it was selected (see Gould and Vrba, 1982). Species of *Leptobrama* and *Toxotes* feed on primarily arthropods and fishes (Goutham-Bharathi et al., 2013; Kembaren and Taufik, 2020). However, archerfishes consume a greater proportion of crustaceans and insects (Simon and Mazlan, 2010) and primarily live in freshwater habitats where encountering these terrestrial and benthic prey is a common occurrence.

The co-option of the grooves in hard and soft tissue, posterior metapterygoid flange, keeled basihyal, and associated adaptive changes to the dorsal margin of the basihyal, would allow for archerfishes to take advantage of these abundant energy resources in terrestrial and buried prey. Additional features, such as improvements in vision, cognition, and swimming ability, are necessary for successful shooting behavior to be executed successfully and further comparisons between leptobramids and toxotids are needed to understand the evolution of these features more broadly.

We found that the oral structures of archerfishes are conserved across species, with some variation in the shape of the basihyal and the position of the rostral cartilaginous cap on the basihyal. We also found the oral structures of archerfishes agree with earlier descriptions of archerfish anatomy and support the original blowpipe hypothesis by Smith (1936, 1945) and Myers (1952). However, other soft-tissue oral structures, including the oral valves highlighted by Elshoud and Koomen (1985), may function in the mechanism. The combined morphological and molecular phylogeny presented provides an opportunity to investigate the evolution of the shooting structures associated with archerfish hunting behavior, which are the result of exaptation of oral structures in the leptobramid-toxotid ancestral lineage. We hope that our findings will inform delimitation of additional species and understanding the evolution of archerfishes. We encourage subsequent authors to generate both morphology-based and DNA-based characters when delimiting species and refining the current species of toxotids so additional evolutionary hypotheses can be produced and tested.

### Material examined

In the following section, specimens examined as prepared cleared-and-stained specimens are denoted “CS”; specimens examined as prepared stained specimens but omit the steps involving trypsin are denoted “SM”; specimens examined as whole ethanol specimens are denoted “ET” with an “\*” indicating one or more specimen(s) were  $\mu$ CT scanned or x-rayed; specimens examined as dry osteological preparations and skeletons are denoted “SK.” Image stacks of  $\mu$ CT-scanned specimens have been uploaded to MorphoSource, with associated media identifiers listed in brackets that follow the preparation types. Following the listing of each taxon, an approximate standard length (SL) or range of SL are listed for the specimens examined.

### Non-carangiform taxa

*Forcipiger flavissimus*: USNM 166647 (1 CS), 76 mm SL.

*Heniochus diphreutes*: USNM 439405 (1 CS), 57 mm SL.

*Lethrinus harak*: USNM 290483 (1 CS), 85 mm SL.

*Lepomis cyanellus*: KUI 15960 (6 CS), 43–62 mm SL.

*Perca flavescens*: KUI 16973 (2 CS), 47–60 mm SL.

#### Carangiform taxa

*Achirus lineatus*: FMNH 113137 (2 CS) 56–58 mm SL.

*Coryphaena hippurus*: FMNH 48561 (2 CS) 73–74 mm SL.

*Lates calcarifer*: AMNH 37839 (1 CS; 1 ET) 82–85 mm SL; USNM 367101 (1 ET) 68 mm SL.

*Leptobrama muelleri*: KUI 41406 (1 CS) 113 mm SL; UW 7204 (1 ET), 270 mm SL.

*Leptobrama pectoralis*: AMNH 219223 (1 SK) 268 mm SL; AMNH 219224 (1 SK) 242 mm SL; QM I.27586 (1 CS; 2 ET\* [000415985]), 117–119 mm SL.

*Nematistius pectoralis*: ANSP 148654 (1 CS) 190 mm SL; SIO 12–3085 (1 CS) 78 mm SL; USNM 81985 (1 ET) 66 mm SL.

*Oligoplites saurus*: KUI 17205 (1 CS; 1 ET) 56–62 mm SL.

*Trachurus trachurus*: KUI 19964 (2 CS; 1 ET) 45–70 mm SL.

#### Toxotidae

*Protoxotes lorentzi*: USNM 406792 (8 ET\* [000415974]) 78–95 mm SL; USNM 454833 (1 CS) 79 mm SL.

*Toxotes blythii*: KUI 42173 (1 CS; 1 ET\* [000415768]) 36–46 mm SL; KUI 42698 (3 ET) 41–45 mm SL; LSUMZ 17019 (2 ET) 74–81 mm SL.

*Toxotes carpentariensis*: CSIRO A3722 (1 ET\* [000415810]) 78 mm SL; FMNH 63925 (3 ET\* [000415956]) 57–87 mm SL; LSUMZ 17586 (2 ET\* [000415830]) 51–57 mm SL; LSUMZ 17587 (3 ET) 21–23 mm SL; USNM 173503 (11 ET\* [000415961]) 46–68 mm SL; USNM 454834 (1 CS) 53 mm SL.

*Toxotes chatareus*: CAS 93958 (2 ET) 118–127 mm SL; CAS 94720 (1 ET\* [000415996]) 93 mm SL; CAS 94737 (2 ET) 94–96 mm SL; CAS 97101 (1 ET) 71 mm SL; CAS 97077 (2 ET) 40–46 mm SL; FMNH 68790 (1 ET\* [000415844]) 93 mm SL; KUI 42697 (1 CS; 1 SM) 55–71 mm SL; KUI 42699 (1 ET) 58 mm SL; OS 4790 (1 ET) 98 mm SL; UF 173178 (3 ET\* [000415834]) 48–53 mm SL; UF 188329 (2 ET) 21–31 mm SL; UF 188548 (3 ET) 17–30 mm SL; UF 241575 (1 ET) 83 mm SL; UMMZ 232552 (2 ET\* [000415826]) 66–78 mm SL; UMMZ 232688 (1 CS; 2 ET\* [000415848]) 43–67 mm SL; UMMZ 234546 (1 ET) 69 mm SL; UMMZ 236673 (1 CS; 3 ET\* [000415822]) 66–94 mm SL; UMMZ 241226 (4 ET\* [000415852]) 45–50 mm SL; UMMZ 241605 (3

ET\* [000415862]) 51–89 mm SL; USNM 364588 (13 ET) 15–38 mm SL.

*Toxotes jaculatrix*: CAS 206638 (2 ET) 37–48 mm SL; CAS 206639 (3 ET) 54–85 mm SL; CAS 206640 (4 ET) 56–145 mm SL; CAS 206641 (6 ET) 18–46 mm SL; CAS 206642 (2 ET) 142–145 mm SL; CAS 206643 (1 ET) 138 mm SL; FMNH 69510 (3 CS, 4 ET) 61–80 mm SL; KUI 42174 (1 CS) 60 mm SL; SU 15516 (9 ET\* [000415806]) 26–65 mm SL; USNM 331437 (1 SM; 9 ET) 30–75 mm SL; USNM 331439 (1 ET) 93 mm SL; USNM 441787 (2 CS) 28–52 mm SL.

*Toxotes kimberleyensis*: AMS I.42570–001 paratype (1 ET\*) 107 mm SL; WAM P.2620–001 (1 ET\* [000415816]) 61 mm SL.

*Toxotes oligolepis*: SU 29567 (1 CS; 1 ET\* [000415840]) 61–72 mm SL.

*Toxotes sundaicus*: ZRC 42270 paratype (2 ET\* [000415979]) 81–88 mm SL.

#### Acknowledgments

We thank R. Smetana for proofreading this study. We thank K. Bemis and M. Pastana (USNM) for thoughtful discussions about morphology and writing. We thank B. Lieberman (KU) for helpful discussions about character evolution and exaptation. We thank M. Kolmann (UMMZ) and S. Whittaker (USNM) for guidance on  $\mu$ CT scanning. We thank W. Tangjitjaroen (Chiang Mai University), Binh D. T. (Nha Trang University), T. De Silva (PU), K. Sorgon (UPLB), D. Lumbantobing (USNM), and R. Abraham for their willingness to translate the synopsis of this study. We thank K. Conway (TCWC) for providing images of type-material drawings in *Francis Hamilton's Gangetic Fishes in Colour*. We thank R. Arrindell, B. Brown, and J. Sparks (AMNH), A. Hay and K. Parkinson (AMS), M. Arce H. and M. Sabaj (ANSP), D. Catania and L. Rocha (CAS), A. King (Charles Darwin University), A. Graham (CSIRO), C. McMahan, S. Mochel, and K. Swagel (FMNH), A. Bentley (KU), G. Dally, M. Hammer, and H. Larson (MAGNT), B. Sidlauskas (OS), B. Frable, P. Hastings, and H. J. Walker Jr. (SIO), L. Page, Z. Randall, and R. Robbins (UF), D. Nelson (UMMZ), C. Baldwin, J. Clayton, G. D. Johnson, K. Murphy, A. Nonaka, L. Parenti, D. Pitassy, S. Raredon, and J. Williams (USNM), K. Maslenikov (UW), M. Allen and G. Moore (WAM), and K. P. Lim (ZRC) for providing data, support, and/or access to specimens or tissues in their care. Analyses were conducted using the Community Cluster at the University of Kansas. Article processing and publication charges were supported by the University of Kansas One University Open Access Author Fund sponsored jointly by the University of Kansas Provost, Vice Chancellor for Research & Graduate Studies, and University of Kansas Medical Center Vice Chancellor

for Research and managed jointly by the Libraries at the Medical Center and Lawrence campuses.

## Funding

Research was funded by a Biodiversity Institute Panorama Grant (awarded to M.G.G.), the University of Kansas Doctoral Student Research Fund (awarded to M.G.G.), a Raney Research Award from the American Society of Ichthyologists and Herpetologists (awarded to M.G.G.), the University of Kansas General Research Fund (2105077 awarded to W.L.S.), National Science Foundation grants (DEB 1258141 and 1543654 awarded to M.P.D. and W.L.S.), and the University of Kansas.

## Supplementary data

Supplementary data are available at *IOB* online.

## Data availability statement

The data underlying this article are available in the article, the online supplementary data, GenBank, and MorphoSource (see supplementary data).

## Declaration of competing interest

The authors declare no competing interests.

## References

- Allen GR. 1978. A review of the archer fishes (family Toxotidae). *Rec West Aust Mus* 6:355–78.
- Allen GR. 2004. *Toxotes kimberleyensis*, a new species of archerfish (Pisces: Toxotidae) from fresh waters of Western Australia. *Rec Aust Mus* 56:225–30.
- Betancur-R. R, Broughton RE, Wiley EO, Carpenter K, López JA, Li C, Holcroft NI, Arcila D, Sanciangco M, Cureton JC, II, et al. 2013b. The tree of life and a new classification of bony fishes. *PLoS Currents* 5.
- Betancur-R. R, Li C, Munroe TA, Ballesteros JA, Ortí G. 2013. Addressing gene tree discordance and non-stationarity to resolve a multi-locus phylogeny of the flatfishes (Teleostei: Pleuronectiformes). *Syst Biol* 62:763–85.
- Betancur-R. R, Ortí G. 2014. Molecular evidence for the monophyly of flatfishes (Carangimorpharia: Pleuronectiformes). *Mol Phylogenet Evol* 73:18–22.
- Betancur-R. R, Wiley EO, Arratia G, Acero A, Bailly N, Miya M, Lecointre G, Ortí G. 2017. Phylogenetic classification of bony fishes. *BMC Evol Biol* 17:162.
- Bolger AM, Lohse M, Usadel B. 2014. Trimmomatic: a flexible trimmer for Illumina sequence data. *Bioinformatics* 30:2114–20.
- Campbell MA, Chen W-J, López JA. 2013. Are flatfishes (Pleuronectiformes) monophyletic? *Mol Phylogenet Evol* 69:664–73.
- Campbell MA, López JA, Satoh TP, Chen W-J, Miya M. 2014. Mitochondrial genomic investigation of flatfish monophyly. *Gene* 551:176–82.
- Carpenter KE, Johnson GD. 2002. A phylogeny of sparoid fishes (Perciformes, Percoidae) based on morphology. *Ichthyol Res* 49:114–27.
- Chen W-J, Bonillo C, Lecointre G. 2003. Repeatability of clades as a criterion of reliability: a case study for molecular phylogeny of Acanthomorpha (Teleostei) with larger number of taxa. *Mol Phylogenet Evol* 26:262–88.
- Chen W-J, Ruiz-Carus R, Ortí G. 2007. Relationships among four genera of mojarra (Teleostei: Perciformes: Gerreidae) from the western Atlantic and their tentative placement among percomorph fishes. *J Fish Biol* 70:202–18.
- Chernomor O, von Haeseler A, Minh BQ. 2016. Terrace aware data structure for phylogenomic inference from supermatrices. *Syst Biol* 65:997–1008.
- Cloquet H. 1816. Archer. In: FG Levrault, editor. *Dictionnaire des sciences naturelles, dans lequel on traite méthodiquement des différents êtres de la nature, considérés soit en eux-mêmes, d'après l'état actuel de nos connoissances, soit relativement à l'utilité qu'en peuvent retirer la médecine, l'agriculture, le commerce et les arts. Suivi d'une biographie des plus célèbres naturalists*, Supplément. Tome Second. Paris (FRA): Le Normant. p. 116.
- Cuvier GL. 1816. Le règne Animal distribué d'après son organisation pour servir de base à l'histoire naturelle des animaux et d'introduction à l'anatomie comparée. Tome II: Les reptiles, les poissons, les mollusques et les annélides. Paris (FRA): Chez Déterville. <https://doi.org/10.5962/bhl.title.39612>
- Dewenter J, Gerullis P, Hecker A, Schuster S. 2017. Archerfish use their shooting technique to produce adaptive underwater jets. *J Exp Biol* 220:1019–25.
- Dill LM. 1977. Refraction and the spitting behavior of the archerfish (*Toxotes chatareus*). *Behav Ecol Sociobiol* 2:169–84.
- Elshoud GCA, Koomen P. 1985. A biomechanical analysis of spitting in archer fishes (Pisces, Perciformes, Toxidae). *Zoomorphology* 105:240–52.
- Faircloth BC. 2013. Illumiprocessor: a Trimmomatic wrapper for parallel adapter and quality trimming. <https://dx.doi.org/10.6079/J9ILL>
- Faircloth BC. 2016. PHYLUCE is a software package for the analysis of conserved genomic loci. *Bioinformatics* 32:786–8.
- Faircloth BC, McCormack JE, Crawford NG, Harvey MG, Brumfield RT, Glenn TC. 2012. Ultraconserved elements anchor thousands of genetic markers spanning multiple evolutionary timescales. *Syst Biol* 61:717–26.
- Faircloth BC, Sorenson L, Santini F, Alfaro ME. 2013. A phylogenomic perspective on the radiation of ray-finned fishes based upon targeted sequencing of ultraconserved elements (UCEs). *PLoS One* 8:e65923.
- Fedorov A, Beichel R, Kalpathy-Cramer J, Finet J, Fillion-Robin J-C, Pujol S, Bauer C, Jennings D, Fennessy F, Sonka M, et al. 2012. 3D Slicer as an image computing platform for the Quantitative Imaging Network. *Magn Reson Imaging* 30:1323–41.
- Gill T. 1909. The archer-fish and its feats. *Smithson Misc Collect* 52:277–86.
- Ghedotti MJ, Gruber JN, Barton RW, Davis MP, Smith WL. 2018. Morphology and evolution of bioluminescent organs in the glowbellies (Percomorpha: Acropomatidae) with comments on the taxonomy and phylogeny of Acropomatiformes. *J Morphol* 279:1640–53.
- Girard MG, Davis MP, Baldwin CC, Dettai A, Martin RP, Smith WL. 2022. Molecular phylogeny of the threadfin fishes (Polynemidae) using ultraconserved elements. *J Fish Biol* 100:793–810.

- Girard MG, Davis MP, Smith WL. 2020. The phylogeny of carangiform fishes: morphological and genomic investigations of a new fish clade. *Copeia* 108:265–98.
- Girard MG, Smith WL. 2016. The phylogeny of marine sculpins of the genus *Icelinus* with comments on the evolution and biogeography of the Pseudoblenninae. *Zootaxa* 4171:549–61.
- Gould SJ, Vrba ES. 1982. Exaptation—a missing term in the science of form. *Paleobiology* 8:4–15.
- Gosline WA. 1971. *Functional Morphology and Classification of Teleostean Fishes*. Honolulu (HI): University of Hawaii Press.
- Goutham-Bharathi MP, Mohanraju R, Krishnan P, Sreeraj CR, Simon KD. 2013. Stomach contents of Banded Archerfish, *Toxotes jaculatrix* (Pallas 1767) (Toxotidae) from brackish waters of South Andaman, India. *Asian Fisheries Science* 26:243–50.
- Greenwood PH. 1976. A review of the family Centropomidae (Pisces, Perciformes). *Bull Br Mus Nat Zool* 29:1–81.
- Greenwood PH, Rosen DE, Weitzman SH, Myers GS. 1966. Phyletic studies of teleostean fishes, with a provisional classification of living forms. *Bull Am Mus Nat Hist* 131:341–455.
- Günther A. 1860. *Catalogue of the Acanthopterygian Fishes in the Collection of the British Museum*. Volume Two. London: Taylor and Francis.
- Gushiken S. 1988. Phylogenetic-relationships of the perciform genera of the family Carangidae. *Ichthyol Res* 34:443–61.
- Harrington RC, Faircloth BC, Eytan RI, Smith WL, Near TJ, Alfaro ME, Friedman M. 2016. Phylogenomic analysis of carangimorph fishes reveals flatfish asymmetry arose in a blink of the evolutionary eye. *BMC Evol Biol* 16:224.
- Harris RS. 2007. Improved pairwise alignment of genomic DNA. PhD thesis, The Pennsylvania State University, State College, Pennsylvania.
- Johnson GD. 1980. The limits and relationships of the Lutjanidae and associated families. *Bull Scripps Inst Oceanogr* 24:1–114.
- Johnson GD. 1984. Percoidae: development and relationships. In: H Moser, W Richards, D Cohen, M Fahay, A Kendall, S Richardson, editors. *Ontogeny and Systematics of Fishes*. Lawrence (KS): Allen Press. p. 464–98.
- Katoh K, Standley DM. 2013. MAFFT multiple sequence alignment software version 7: improvements in performance and usability. *Mol Biol Evol* 30:772–80.
- Kearse M, Moir R, Wilson A, Stones-Havas S, Cheung M, Sturrock S, Buxton S, Cooper A, Markowitz S, Duran C, et al. 2012. Geneious Basic: an integrated and extendable desktop software platform for the organization and analysis of sequence data. *Bioinformatics* 28:1647–9.
- Kembaren DD, Taufik M. 2020. Biological aspects of *Leptobrama pectoralis* Ramsay and Ogilby 1887 (Leptobramidae) in Merauke, Papua, Indonesia. *IOP Conference Series: Earth and Environmental Science* 404:012021.
- Kimura S, Peristiwady T, Fricke R. 2016. Taxonomic review of the genus *Leptobrama* Steindachner 1878 (Perciformes: Leptobramidae), with the resurrection of *Leptobrama pectoralis* (Ramsay and Ogilby 1887). *Ichthyol Res* 63:435–44.
- Kottelat M. 2013. The fishes of the inland waters of southeast Asia: a catalogue and core bibliography of the fishes known to occur in freshwaters, mangroves and estuaries. *Raffles Bull Zool Supplement* 27:1–663.
- Kottelat M, Tan HH. 2018. Three new species of archerfishes from the freshwaters of Southeast Asia (Teleostei: Toxotidae) and notes on Henri Mouhot's fish collections. *Ichthyol Explor Freshw* 28:211–29.
- Lanfear R, Calcott B, Kainer D, Mayer C, Stamatakis A. 2014. Selecting optimal partitioning schemes for phylogenomic datasets. *BMC Evol Biol* 14:82.
- Lanfear R, Frandsen PB, Wright AM, Senfeld T, Calcott B. 2017. PartitionFinder 2: new methods for selecting partitioned models of evolution for molecular and morphological phylogenetic analyses. *Mol Biol Evol* 34:772–3.
- Li B, Dettai A, Cruaud C, Couloux A, Desoutter-Meniger M, Lecointre G. 2009. RNF213, a new nuclear marker for acanthomorph phylogeny. *Mol Phylogenet Evol* 50:345–63.
- Li C, Betancur-R. R, Smith WL, Ortí G. 2011. Monophyly and interrelationships of snook and barramundi (Centropomidae sensu Greenwood) and five new markers for fish phylogenetics. *Mol Phylogenet Evol* 60:463–71.
- Märss T, Wilson MV, Saat T, Špilev H. 2017. Gill rakers and teeth of three pleuronectiform species (Teleostei) of the Baltic Sea: a microichthyological approach. *Estonian Journal of Earth Sciences* 66:21–6.
- Martin RP, Olsen EE, Girard MG, Smith WL, Davis MP. 2018. Light in the darkness: new perspective on lanternfish relationships and classification using genomic and morphological data. *Mol Phylogenet Evol* 121:71–85.
- McAllister DE. 1968. Evolution of branchiostegals and classification of teleostome fishes. *Bull Natl Mus Can* 221:1–239.
- Merrick JR, Schmida GE. 1984. *Australian Freshwater Fishes: Biology and Management*. Netley (AUS): Griffin Press Limited.
- Milburn O, Alexander RMcN. 1976. The performance of the muscles involved in spitting by the Archerfish *Toxotes*. *J Zool* 180:243–51.
- Miller DJ, Lea RN. 1972. *Guide to the Coastal Marine Fishes of California*. Sacramento (CA): Fish Bulletin 157, California Department of Fish and Game.
- Mirande JM. 2017. Combined phylogeny of ray-finned fishes (Actinopterygii) and the use of morphological characters in large-scale analyses. *Cladistics* 33:333–50.
- Minh BQ, Schmidt HA, Chernomor O, Schrempf D, Woodhams MD, von Haeseler A, Lanfear R. 2020. IQ-TREE 2: New models and efficient methods for phylogenetic inference in the genomic era. *Mol Biol Evol* 37:1530–4.
- Mok HK, Shen SC. 1983. Osteology and phylogeny of Squamipinnes. *Taiwan Mus Spec Publ Ser Zool* 1:1–87.
- Morgan DL, Gill HS. 2006. Osteology of the first dorsal fin in two terapontid fishes, *Leiopotherapon unicolor* (Günther, 1859) and *Amniataba caudavittata* (Richardson, 1845), from Western Australia: evidence for hybridisation? *Rec West Aust Mus* 23:133–44.
- Munroe TA. 1992. Interdigitation pattern of dorsal-fin pterygiophores and neural spines, an important diagnostic character for symphurine tonguefishes (*Symphurus*: Cynoglossidae: Pleuronectiformes). *Bull Mar Sci* 50:357–403.
- Myers GS. 1952. How the shooting apparatus of the archer fish was discovered. *Aquarium J* 23:210–4.
- Near TJ, Dornburg A, Eytan RI, Keck BP, Smith WL, Kuhn KL, Moore JA, Price SA, Burbrink FT, Friedman M, et al. 2013. Phylogeny and tempo of diversification in the superradiation of spiny-rayed fishes. *Proc Natl Acad Sci* 110:12738–43.
- Near TJ, Eytan RI, Dornburg A, Kuhn KL, Moore JA, Davis MP, Wainwright PC, Friedman M, Smith WL. 2012. Resolution of ray-finned fish phylogeny and timing of diversification. *Proc Natl Acad Sci* 109:13698–703.
- Nixon K. 2002. WinClada version 1.00.08.

- Patterson C. 1970. A clupeomorph fish from the Gault (Lower Cretaceous). *Zool J Linn Soc* 49:161–82.
- Pethiyagoda R, Gill AC. 2013. Taxonomy and distribution of Indo-Pacific *Lates*. In: DR Jerry, editor. *Biology and Culture of Asian Seabass Lates calcarifer*. Boca Raton (FL): CRC Press. p. 1–15.
- Ponssa ML, Abdala V. 2020. Sesamoids in Caudata and Gymnophiona (Lissamphibia): absences and evidence. *PeerJ* 8:e10595.
- Potthoff T. 1984. Clearing and staining techniques. In: H Moser, W Richards, D Cohen, M Fahay, A Kendall, S Richardson, editors. *Ontogeny and Systematics of Fishes*. Lawrence (KS): Allen Press. p. 35–7.
- Prijbelski A, Antipov D, Meleshko D, Lapidus A, Korobeynikov A. 2020. Using SPAdes de novo assembler. *Curr Protoc Bioform* 70:e102.
- Puillandre N, Brouillet S, Achaz G. 2021. ASAP: assemble species by automatic partitioning. *Mol Ecol Resour* 21:609–20.
- QGIS Development Team. 2020. QGIS Geographic Information System. QGIS Association (<http://www.qgis.org>).
- Rabosky DL, Chang J, Title PO, Cowman PF, Sallan L, Friedman M, Kaschner K, Garilao C, Near TJ, Coll M, et al. 2018. An inverse latitudinal gradient in speciation rate for marine fishes. *Nature* 559:392–5.
- Rambaut A. 2012. FigTree version 1.4 (<https://github.com/rambaut/figtree/>).
- Rojo AL. 2018. *Dictionary of Evolutionary Fish Osteology*. Boca Raton (FL): CRC Press.
- Rolfe S, Pieper S, Porto A, Diamond K, Winchester J, Shan S, Kirveslahti H, Boyer D, Summers A, Maga AM. 2021. SlicerMorph: An open and extensible platform to retrieve, visualize and analyse 3D morphology. *Methods Ecol Evol* 12: 1816–25.
- Ross ST. 2001. *The Inland Fishes of Mississippi*. Jackson (MS): University Press of Mississippi.
- Sabaj MH. 2020. Codes for natural history collections in ichthyology and herpetology. *Copeia* 108:593–669.
- Salini JP, Brewer DT, Blaber S. 1998. Dietary studies on the predatory fishes of the Norman River Estuary, with particular reference to penaeid prawns. *Estuarine Coastal Shelf Sci* 46:837–47.
- Sanciango MD, Carpenter KE, Betancur-R R. 2016. Phylogenetic placement of enigmatic percomorph families (Teleostei: Percomorphaceae). *Mol Phylogenet Evol* 94:565–76.
- Schlosser JA. 1764. An account of a fish from Batavia, called jaculator: In a letter to Mr. Peter Collinson, F.R.S. from John Albert Schlosser, MD F.R.S. *Philos Trans R Soc Lond* 54:89–91.
- Schuster S. 2007. Archerfish. *Curr Biol* 17:R494–5.
- Schuster S, Rossel S, Schmidtmann A, Jäger I, Poralla J. 2004. Archer fish learn to compensate for complex optical distortions to determine the absolute size of their aerial prey. *Curr Biol* 14:1565–8.
- Shinohara G. 1994. Comparative morphology and phylogeny of the suborder Hexagrammoidei and related taxa (Pisces: Scorpaeniformes). *Memoirs of the Faculty of Fisheries Hokkaido University* 41:1–97.
- Simon KD, Mazlan AG. 2010. Trophic position of archerfish species (*Toxotes chatareus* and *Toxotes jaculator*) in the Malaysian estuaries. *J Appl Ichthyol* 26: 84–8.
- Smith HM. 1936. The archer fish. *Natur Hist* 38:2–11.
- Smith HM. 1945. The fresh-water fishes of Siam, or Thailand. *Bull U.S. Natl Mus* 188:1–622.
- Smith WL, Buck CA, Ornaty GS, Davis MP, Martin RP, Gibson SZ, Girard MG. 2018. Improving vertebrate skeleton images: fluorescence and the non-permanent mounting of cleared-and-stained specimens. *Copeia* 106:427–35.
- Smith WL, Stern JH, Girard MG, Davis MP. 2016. Evolution of venomous cartilaginous and ray-finned fishes. *Integr Comp Biol* 56:950–61.
- Springer VG, Orrell TM. 2004. Appendix: phylogenetic analysis of 147 families of acanthomorph fishes based primarily on dorsal gill-arch muscles and skeleton. *Bull Biol Soc Wash* 11: 237–60.
- Springer VG, Smith-Vaniz WF. 2008. Supraneural and pterygiophore insertion patterns in carangid fishes, with description of a new Eocene carangid tribe, †Paratrachinotini, and a survey of anterior anal-fin pterygiophore insertion patterns in Acanthomorpha. *Bull Biol Soc Wash* 16:1–73.
- Stamatakis A. 2014. RAxML version 8: a tool for phylogenetic analysis and post-analysis of large phylogenies. *Bioinformatics* 30:1312–3.
- Tagliacollo VA, Lanfear R. 2018. Estimating improved partitioning schemes for ultraconserved elements. *Mol Biol Evol* 35:1798–811.
- Taylor WR. 1964. Fishes of Arnhem Land. In: RL Specht, editor. *Records of the American-Australian Scientific Expedition to Arnhem Land 4. Zoology*. Melbourne (AUS): Melbourne University Press. p. 45–307.
- Timmermans PJA, Souren PM. 2004. Prey catching in archer fish: the role of posture and morphology in aiming behavior. *Physiol Behav* 81:101–10.
- Tominaga Y. 1965. The internal morphology and systematic position of *Leptobrama mülleri*, formerly included in the family Pempheridae. *Jpn J Ichthyol* 12:33–56.
- Webb JF. 1989. Gross morphology and evolution of the mechanoreceptive lateral-line system in teleost fishes (Part 2 of 2). *Brain Behav Evol* 33:44–53.
- Weber MWC, de Beaufort LF. 1936. The Fishes of the Indo-Australian Archipelago: Perciformes (continued) families: Chaetodontidae, Toxotidae, Monodactylidae, Pempheridae, Kyphosidae, Lutjanidae, Lobotidae, Sparidae, Nandidae, Sciaenidae, Malacanthidae, Cepolidae. VII. Leiden (GER): E. J. Brill.
- Weitzman SH. 1974. Osteology and evolutionary relationships of the Sternoptychidae. *Bull Am Mus Nat Hist* 153:327–478.
- Westneat MW. 1993. Phylogenetic relationships of the tribe Cheilini (Labridae: Perciformes). *Bull Mar Sci* 52: 351–94.
- Whitley GP. 1950. Studies in ichthyology. No. 14. *Rec Aust Mus* 22:234–45.
- Yagishita N, Miya M, Yamanoue Y, Shirai SM, Nakayama K, Suzuki N, Satoh TP, Mabuchi K, Nishida M, Nakabo T. 2009. Mitogenomic evaluation of the unique facial nerve pattern as a phylogenetic marker within the perciform fishes (Teleostei: Perciformes). *Mol Phylogenet Evol* 53: 258–66.
